# Supplementary material for: A plug-and-play monofunctional platform for targeted degradation of extracellular proteins and vesicles
Source: PubMed Central journal article supplement — Nat Commun. 2024 Aug 22;15:7237. doi: 10.1038/s41467-024-51720-z (PMC11341853; doi:10.1038/s41467-024-51720-z), 2024-08-22
Supplement: 41467_2024_51720_MOESM1_ESM.pdf [file 41467_2024_51720_MOESM1_ESM.pdf]

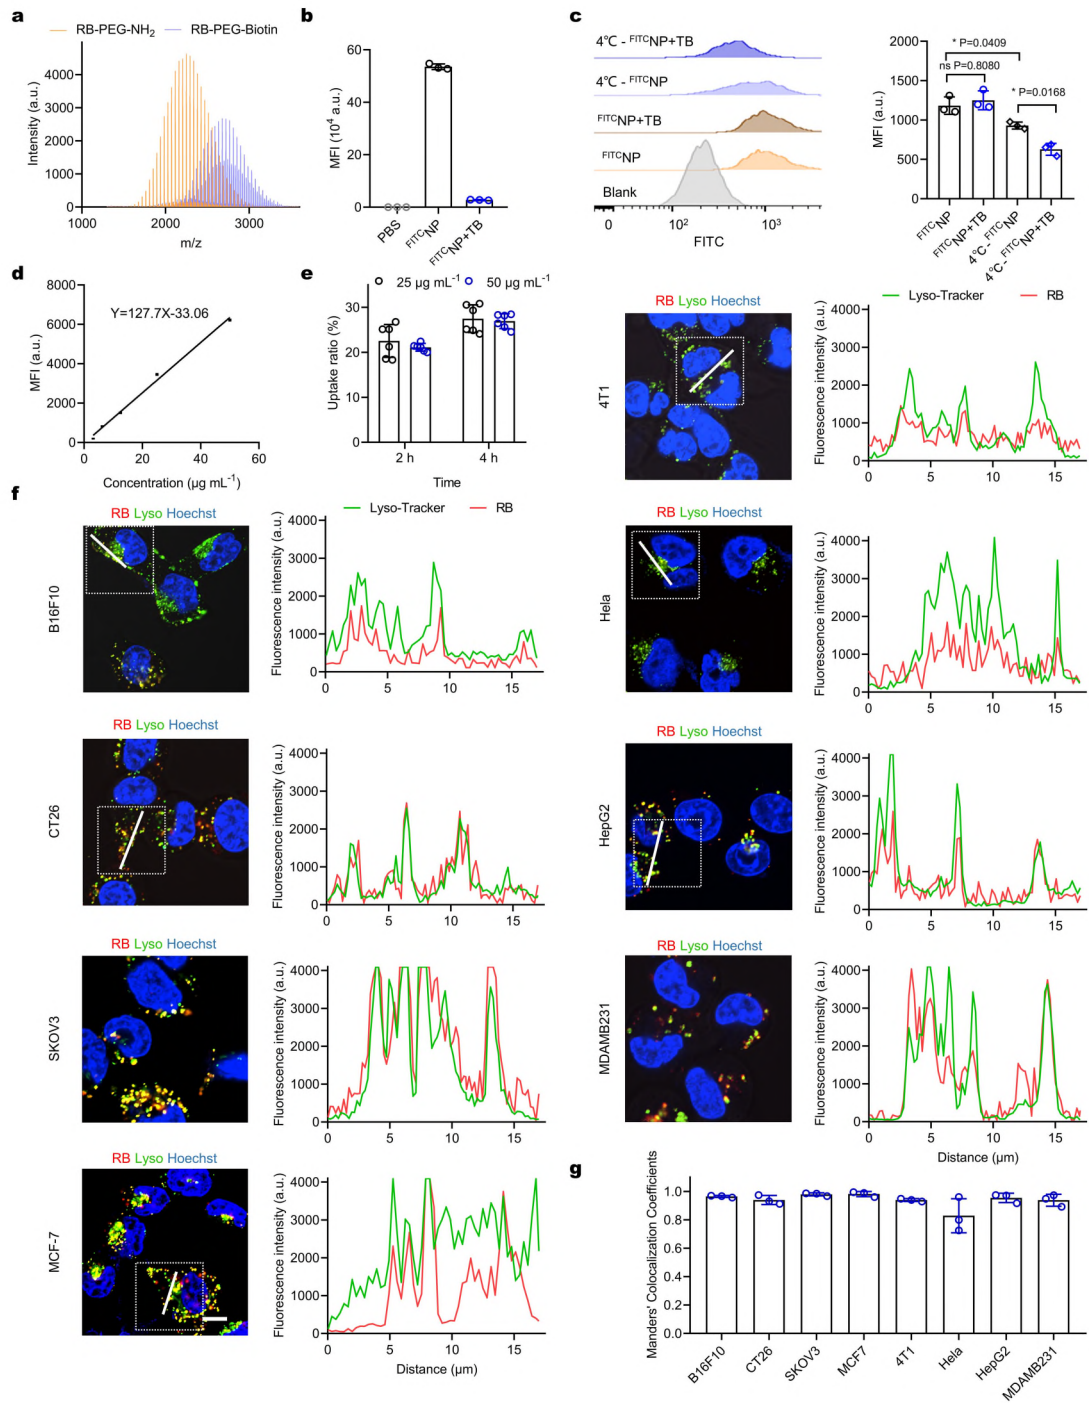

**Supplementary Fig. 1 Lysosome-targeting endocytosis of RBNPs.** **a**, MALDI-TOF mass spectrum of RB-PEG-Biotin and RB-PEG-NH<sub>2</sub>. **b**, Fluorescence intensity of FITCNP (50 μg mL<sup>-1</sup>) in the presence or absence of 0.01% Trypan Blue (TB) (n = 3 biologically independent experiments). Ex: 494 nm; Em: 525 nm. **c**, Flow cytometry analysis of B16F10 cells co-incubated with FITCNP (50 μg mL<sup>-1</sup>) at 37 °C or 4 °C for 1.5 hours, followed by 0.01% TB treatment (n = 3 biologically independent experiments,

---

each counting 10,000 cells). **d**, Standard curve for fluorescence intensity versus <sup>RB</sup>NP concentration. **e**, Ratios of internalized <sup>RB</sup>NPs after co-incubation with B16F10 cells for 2 or 4 hours (n = 6 biologically independent experiments). **f**, Live-cell images of different cell lines treated with <sup>RB</sup>NPs (100 μg mL<sup>-1</sup>) for 4 hours and the resulting fluorescence intensity profiles along the line plotted in the boxes. Scale bar, 5 μm. The images are representative of n = 3 biological replicates. **g**, Manders' colocalization coefficients (MCC) measuring the colocalization of <sup>RB</sup>NPs and lysosomes in different cell lines (n = 3 biologically independent experiments). Data are presented as mean values ± SD where relevant. *P* values were determined by one-way ANOVA with Tukey's multiple comparisons test. ns, no significant; \**p* < 0.05. Source data are provided as a Source Data file.

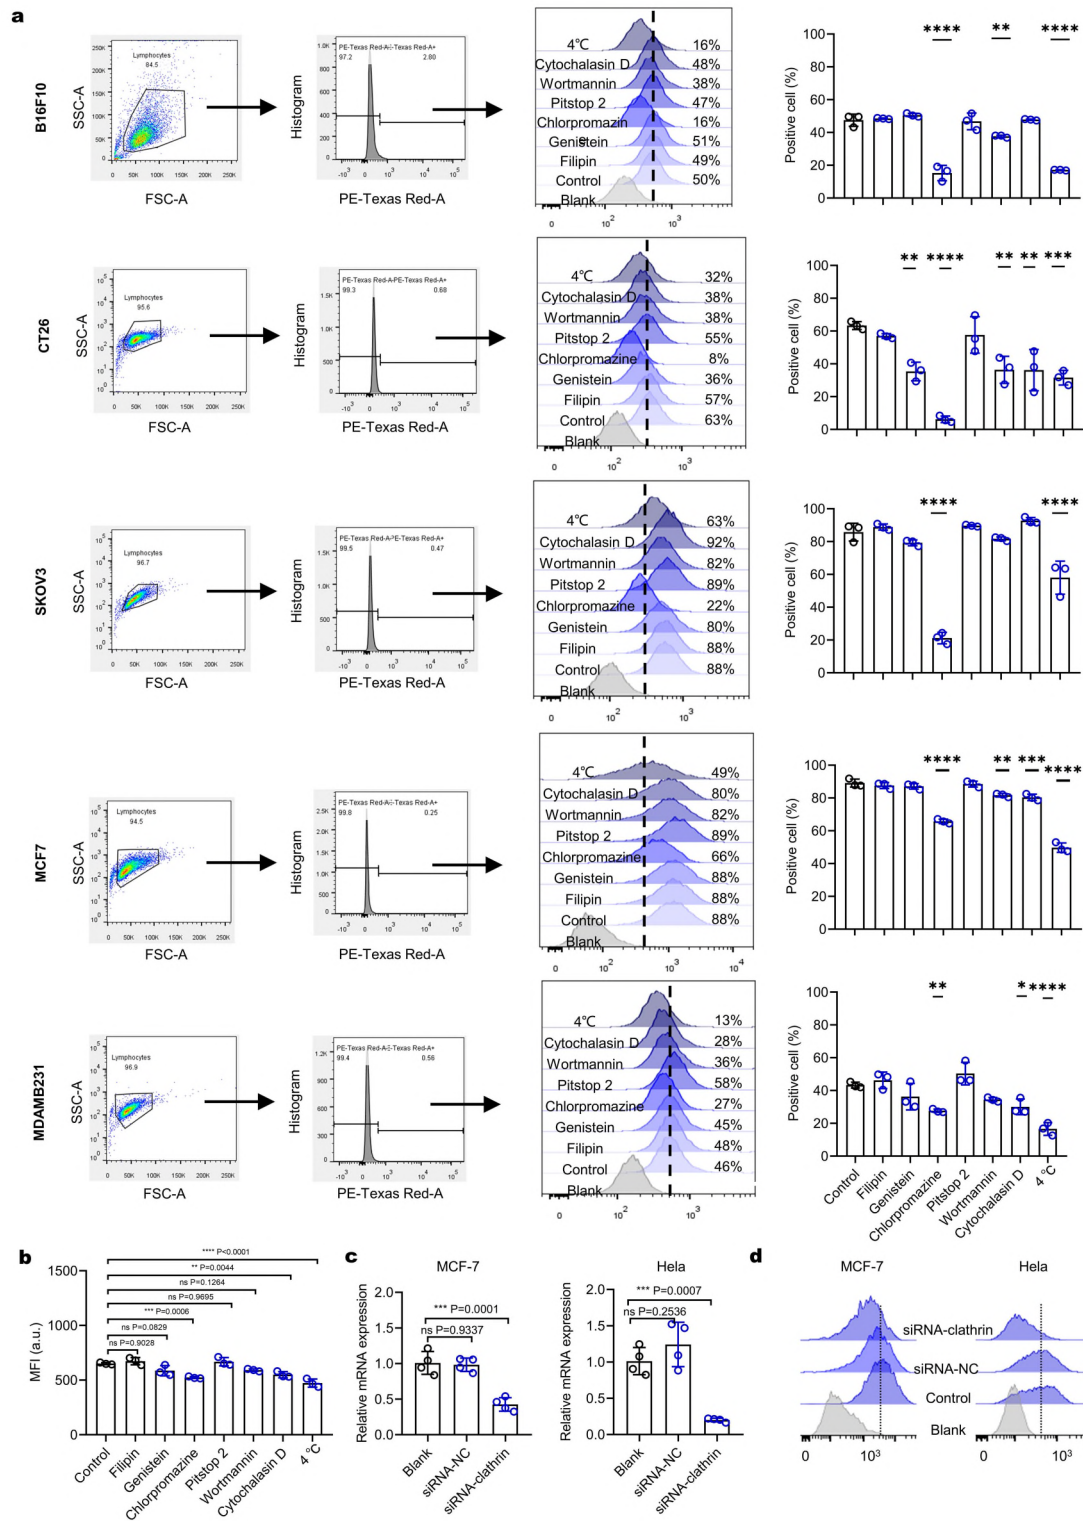

**Supplementary Fig. 2 Determination of the endocytic pathway of <sup>RB</sup>NP.** **a**, Flow cytometry gating strategy for analyzing RB-positive cells (n = 3 biologically independent experiments, each counting 10,000 cells). **b**, Effects of endocytic inhibitors on cellular uptake of <sup>RB</sup>NPs in MDAMB231 cells in terms of the RB intensity measured by flow cytometry (n = 3 biologically independent experiments, each counting 10,000

---

cells). **c**, Validation of clathrin knockdown using RT-qPCR. MCF-7 cells were treated with 120 nM of siRNA-NC or siRNA-clathrin for 48 hours, while HeLa cells were treated with 160 nM of siRNA-NC or siRNA-clathrin for 60 hours (n = 4 biologically independent experiments, each counting 10,000 cells). **d**, Cellular uptake of<sup>RB</sup>NPs in siRNA-treated MCF-7 cells or HeLa cells after 2-hour incubation. The uptake profiles are representative of n = 3 biological replicates. Data are presented as mean values ± SD where relevant. *P* values were determined by one-way ANOVA with Dunnett's *post hoc* test. \**p* < 0.05; \*\**p* < 0.01; \*\*\*\**p* < 0.0001. Source data are provided as a Source Data file.

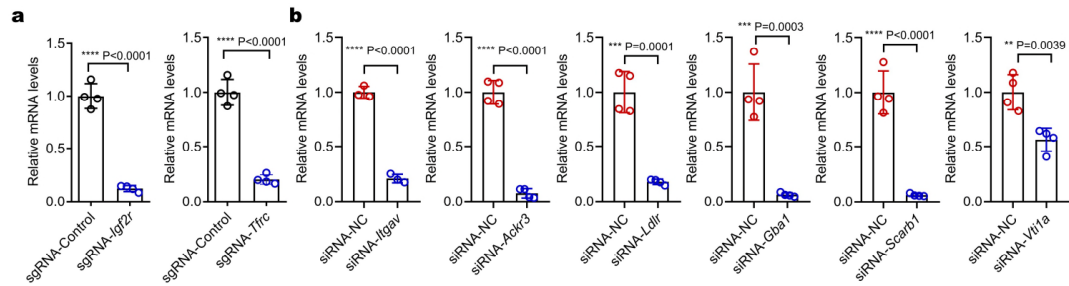

**Supplementary Fig. 3 Targeted gene silencing via CRISPR interference or RNA interference. a**, Validation of *Igf2r* (n = 4 biological replicates) or *Tfrc* (n = 4 biological replicates) knockout in B16F10 cells using RT-qPCR. **b**, Validation of *Itgav* (n = 3 biological replicates), *Ackr3* (n = 4 biological replicates), *Ldlr* (n = 4 biological replicates), *Gba1* (n = 4 biological replicates), *Scarb1* (n = 4 biological replicates), or *Vt1a* (n = 4 biological replicates) knockdown in B16F10 cells using RT-qPCR. *P* values were determined by unpaired two-tailed *t*-tests. Data are presented as mean values  $\pm$  SD where relevant. \*\**p* < 0.01, \*\*\**p* < 0.001, \*\*\*\**p* < 0.0001. Source data are provided as a Source Data file.

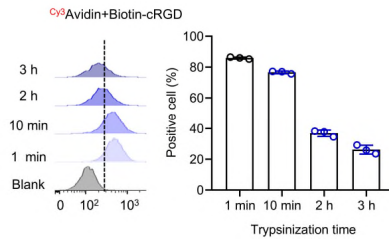

**Supplementary Fig. 4** Cellular uptake of  $\text{Cy}^3$  Avidin (50 nM) mediated by biotin-cRGD (200 nM) after co-incubation with B16F10 cells for 4 hours. Cells were pre-treated with trypsin within 3 hours ( $n = 3$  biologically independent experiments, each counting 5,000 cells). Data are presented as mean values  $\pm$  SD where relevant. Source data are provided as a Source Data file.

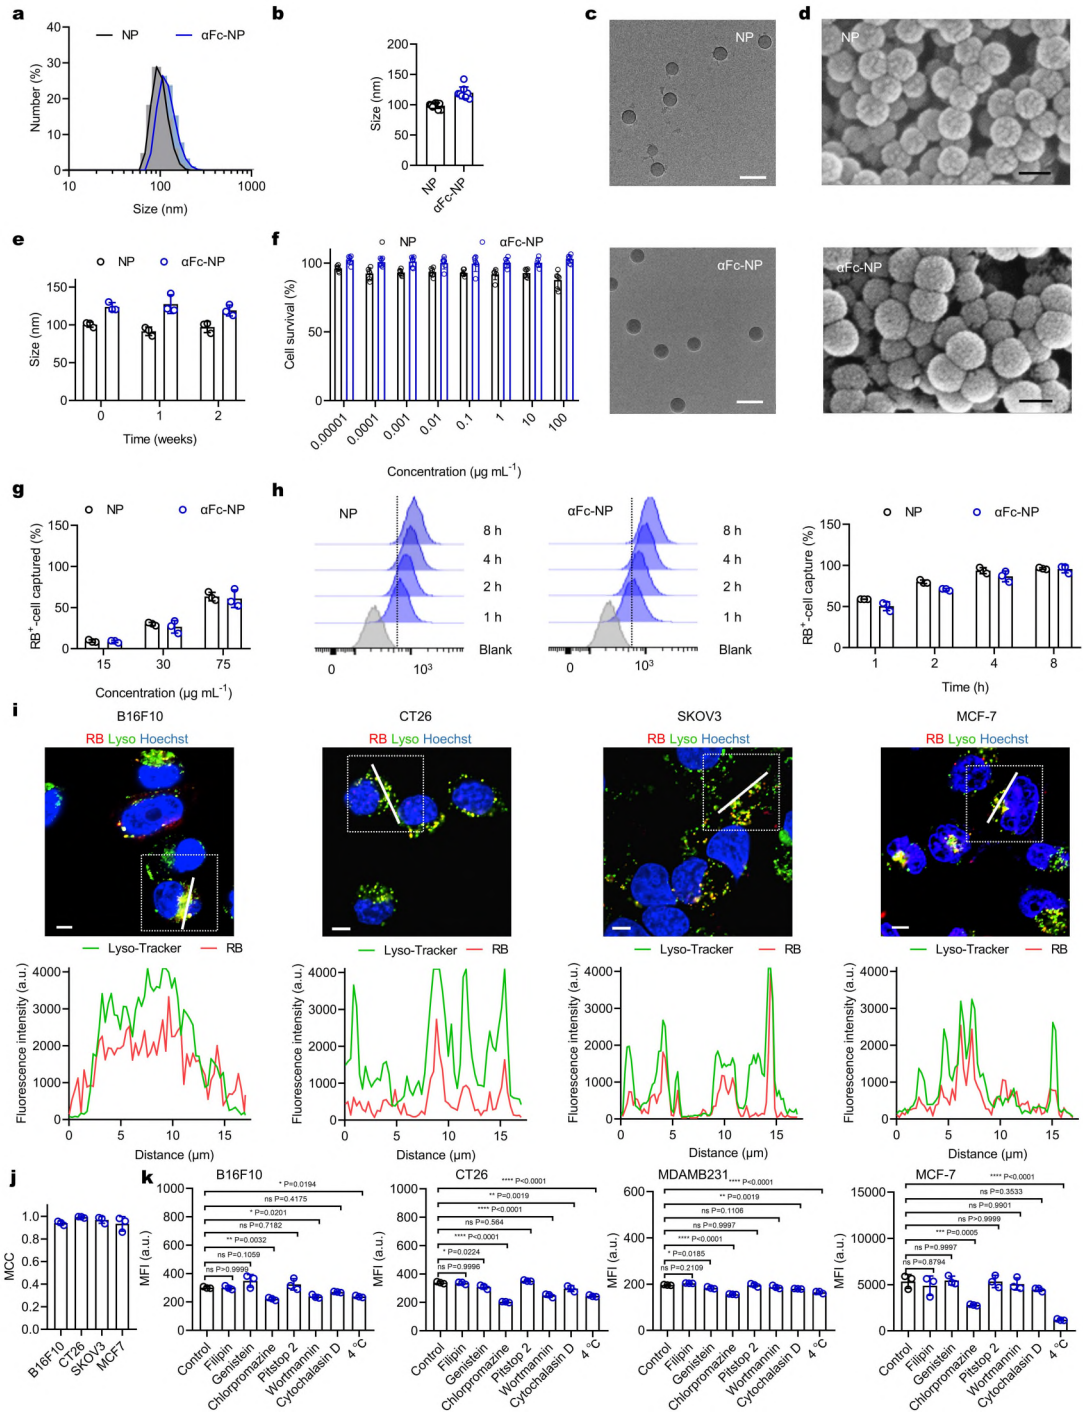

**Supplementary Fig. 5 Characterization and cellular uptake of  $\alpha$ Fc-NPs.** **a**, Size distribution of NP and  $\alpha$ Fc-NP determined by dynamic light scattering (DLS). **b** Average size of NP and  $\alpha$ Fc-NP measured by DLS ( $n = 8$  independent replicates). **c**, **d**, Representative TEM (**c**) and SEM (**d**) images of NP and  $\alpha$ Fc-NP. Scale bar, 200 nm. The TEM and SEM images are representative of  $n = 3$  independent replicates. **e**, Stability test of NP and  $\alpha$ Fc-NP by measuring the change in particle size after storage

---

for the indicated durations at 4 °C (n = 3 independent replicates). **f**, Cytotoxicity of NP and  $\alpha$ Fc-NP on B16F10 cells determined by the CCK-8 assay (n = 6). **g**, **h**, Flow cytometry analysis of cellular uptake of  $^{RB}$ NP or  $\alpha$ Fc- $^{RB}$ NP in B16F10 cells at the indicated concentrations within 2 hours (**g**) or at the concentration of 100  $\mu$ g mL<sup>-1</sup> within the indicated time durations (**h**) (n = 3 biologically independent experiments, each counting 10,000 cells). **i**, Live-cell images of different cell lines treated with  $\alpha$ Fc- $^{RB}$ NP (100  $\mu$ g mL<sup>-1</sup>) for 4 hours and the resulting fluorescence intensity profiles along the line plotted in the boxes. Scale bar, 5  $\mu$ m. The images are representative of n = 3 biological replicates. **j**, Manders' colocalization coefficients (MCC) measuring the colocalization of  $\alpha$ Fc- $^{RB}$ NPs within lysosomes in different cell lines (n = 3 biologically independent experiments). **k**, Effects of endocytic inhibitors on cellular uptake of  $\alpha$ Fc- $^{RB}$ NP in B16F10, CT26, MCF-7, and MDAMB231 cells in terms of the RB intensity measured by flow cytometry (n = 3 biologically independent experiments, each counting 10,000 cells). *P* values were determined by one-way ANOVA with Dunnett's *post hoc* test. \**p* < 0.05; \*\**p* < 0.01; \*\*\**p* < 0.001; \*\*\*\**p* < 0.0001. Data are presented as mean values  $\pm$  SD where relevant. Source data are provided as a Source Data file.



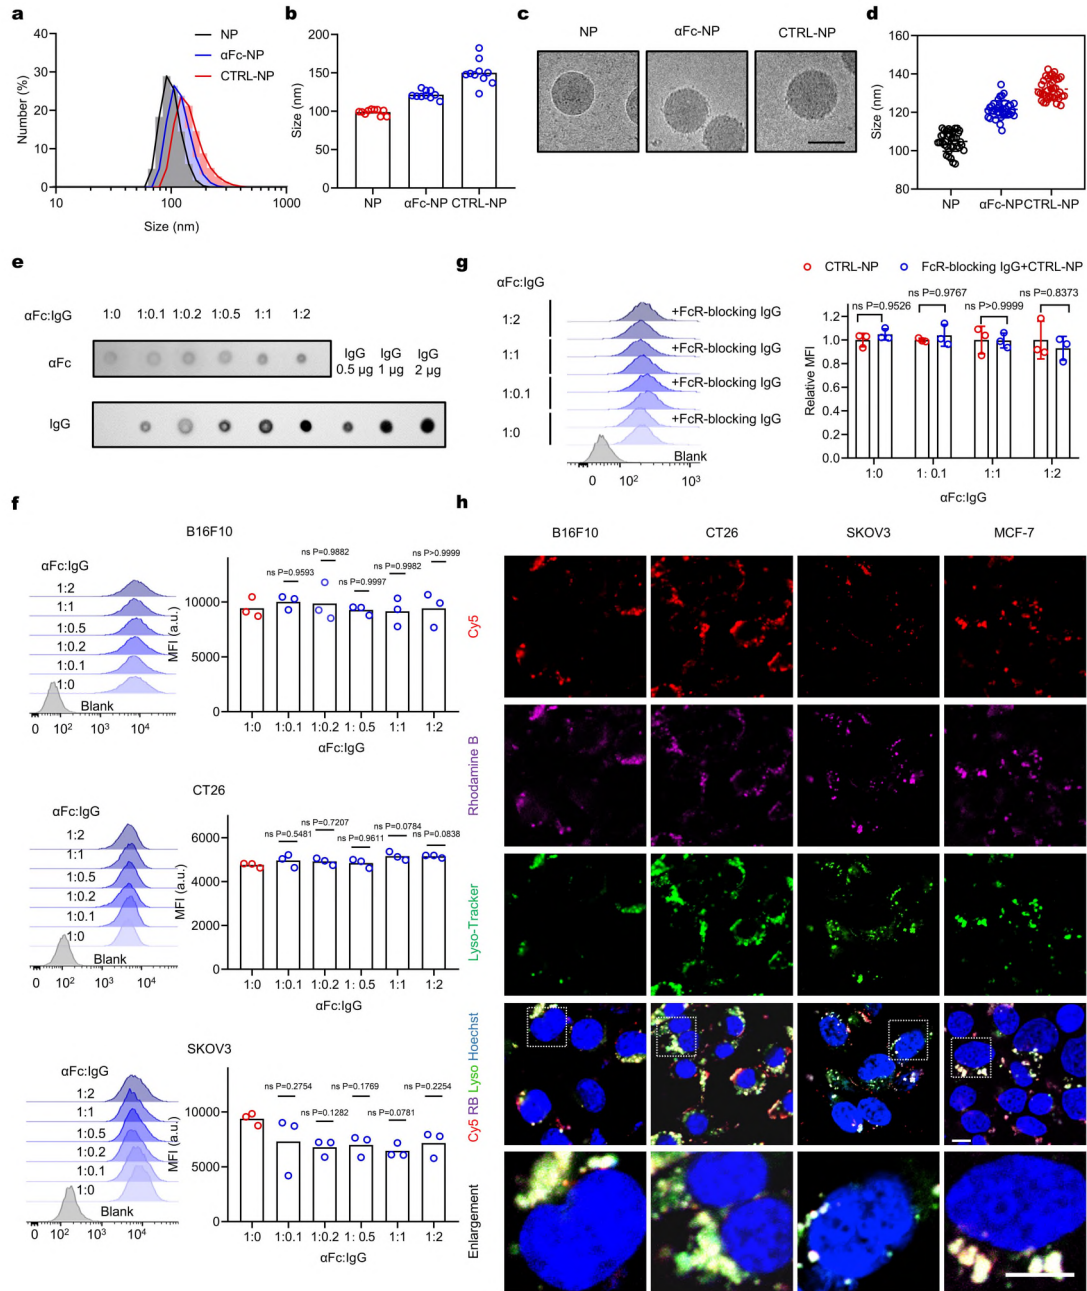

**Supplementary Fig. 6 Characterization and lysosome-targeting ability of CTRL-NP.** **a**, Size distribution of NP,  $\alpha$ Fc-NP, and CTRL-NP determined by DLS. **b**, Average size of NP,  $\alpha$ Fc-NP, and CTRL-NP measured by DLS ( $n = 10$  biologically independent experiments). **c**, Representative Cryo-TEM images of NP,  $\alpha$ Fc-NP, and CTRL-NP. Scale bar, 100 nm. The Cryo-TEM images are representative of  $n = 3$  independent replicates. **d**, Particle size distribution analysis of Cryo-TEM images with ImageJ ( $n = 37$  nanoparticles). **e**, Dot blot assay for quantifying the  $\alpha$ Fc and IgG concentrations in CTRL-NPs with varying  $\alpha$ Fc:IgG ratios. **f**, Cellular uptake of CTRL-NPs with varying  $\alpha$ Fc:IgG ratios. **g**, Relative MFI of  $\alpha$ Fc:IgG ratios. **h**, Cellular uptake of CTRL-NPs with varying  $\alpha$ Fc:IgG ratios. Scale bar, 100 nm.

---

varying  $\alpha$ Fc:IgG molar ratios in B16F10, CT26, and SKOV3 cells within 4 hours (n = 3 biologically independent experiments, each counting 10,000 cells). *P* values were determined by one-way ANOVA with Dunnett's *post hoc* test. ns, no significant. **g**, Cellular uptake of CTRL-<sup>RB</sup>NPs (50  $\mu$ g mL<sup>-1</sup>) with varying  $\alpha$ Fc:IgG molar ratios in FcR-preblocked B16F10 cells within 4 hours. B16F10 cells were pre-treated with mouse FcR-blocking antibody for 10 hours (n = 3 biologically independent experiments, each counting 10,000 cells). *P* values were determined by *t*-test. ns, no significant. **h**, Live-cell images of different cell lines treated with <sup>Cy5</sup>CTRL-<sup>RB</sup>NPs (50  $\mu$ g mL<sup>-1</sup>) for 10 hours. Scale bar, 10  $\mu$ m. The images are representative of n = 3 biological replicates. Data are presented as mean values  $\pm$  SD where relevant. Source data are provided as a Source Data file.

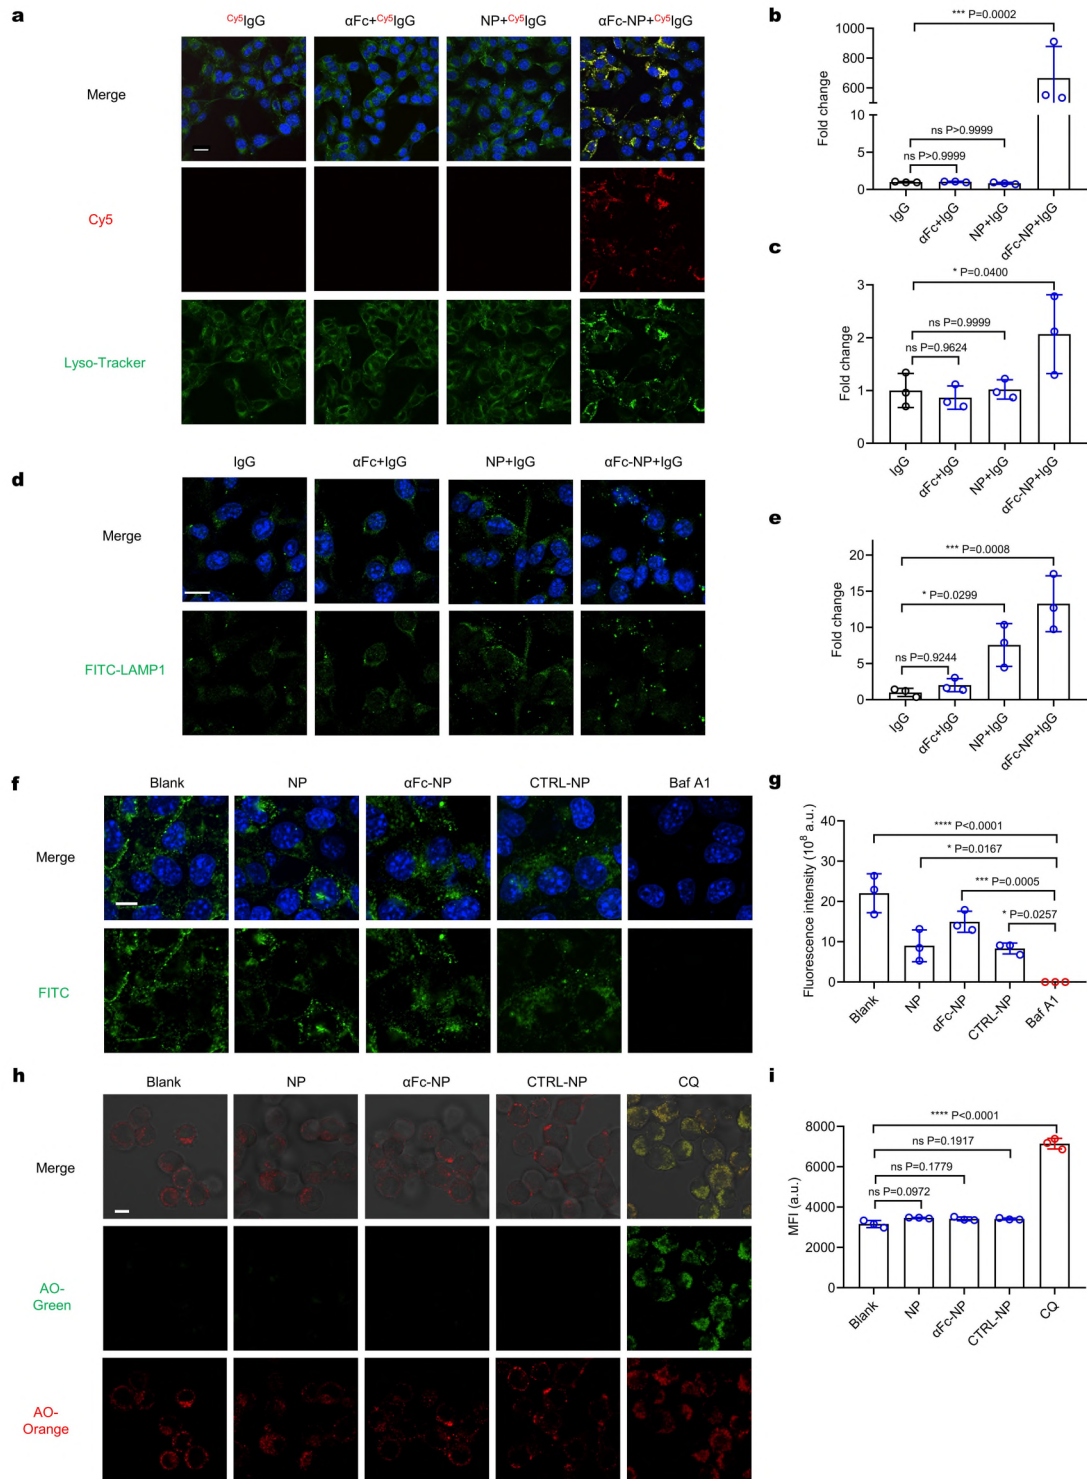

**Supplementary Fig. 7 Effects of MONOTAB on lysosomal function. a**, Live-cell images of B16F10 cells treated with Cy<sup>5</sup>IgG, Cy<sup>5</sup>IgG + αFc, Cy<sup>5</sup>IgG + NP, or Cy<sup>5</sup>IgG + αFc-NP for 10 hours. The corresponding concentrations of Cy<sup>5</sup>IgG, αFc, and NP were 2, 2, and 50 μg mL<sup>-1</sup>, respectively. Scale bar, 20 μm. These images are representative of n = 3 biological replicates. **b**, **c**, Fold changes in MFI of the Cy5 (**b**) or LysoTracker (**c**) signal in **a** (n = 3 biologically independent experiments). **d**, Immunofluorescence

---

analysis of LAMP1 in B16F10 cells treated with IgG, IgG +  $\alpha$ Fc, IgG + NP, or IgG +  $\alpha$ Fc-NP for 10 hours. The corresponding concentrations of <sup>Cy5</sup>IgG,  $\alpha$ Fc, and NP were 2, 2, and 50  $\mu\text{g mL}^{-1}$ , respectively. Scale bar, 20  $\mu\text{m}$ . These images are representative of  $n = 3$  biological replicates. **e**, Fold changes in MFI of the FITC signal in **d** within individual cells calculated from triplicate samples. **f**, Live-cell images of B16F10 cells treated with 50  $\mu\text{g mL}^{-1}$  of NP,  $\alpha$ Fc-NP, or CTRL-NP for 10 hours or 100 nM of Bafilomycin A1(Baf A1) for 1 hour, then loaded with DQ Green BSA for 10 hours. Scale bar, 10  $\mu\text{m}$ . These images are representative of  $n = 3$  biological replicates. **g**, Quantification of green fluorescence in **f** using ImageJ ( $n = 3$  biologically independent experiments). **h i**, Live-cell images (**h**) and flow cytometry analysis (**i**) of B16F10 cells treated with 50  $\mu\text{g mL}^{-1}$  of NP,  $\alpha$ Fc-NP, or CTRL-NP for 10 hours or 10  $\mu\text{M}$  of chloroquine (CQ) plus 50  $\mu\text{M}$  of  $\text{ZnCl}_2$  for 30 minutes, then stained with acridine orange for 15 minutes ( $n = 3$  biologically independent experiments, each counting 10,000 cells). Scale bar, 10  $\mu\text{m}$ . These images are representative of  $n = 3$  biological replicates. Data are presented as mean values  $\pm$  SD where relevant. *P* values were determined by one-way ANOVA with Dunnett's *post hoc* test. ns, no significant; \**p* < 0.05; \*\*\**p* < 0.001; \*\*\*\**p* < 0.0001. Source data are provided as a Source Data file.

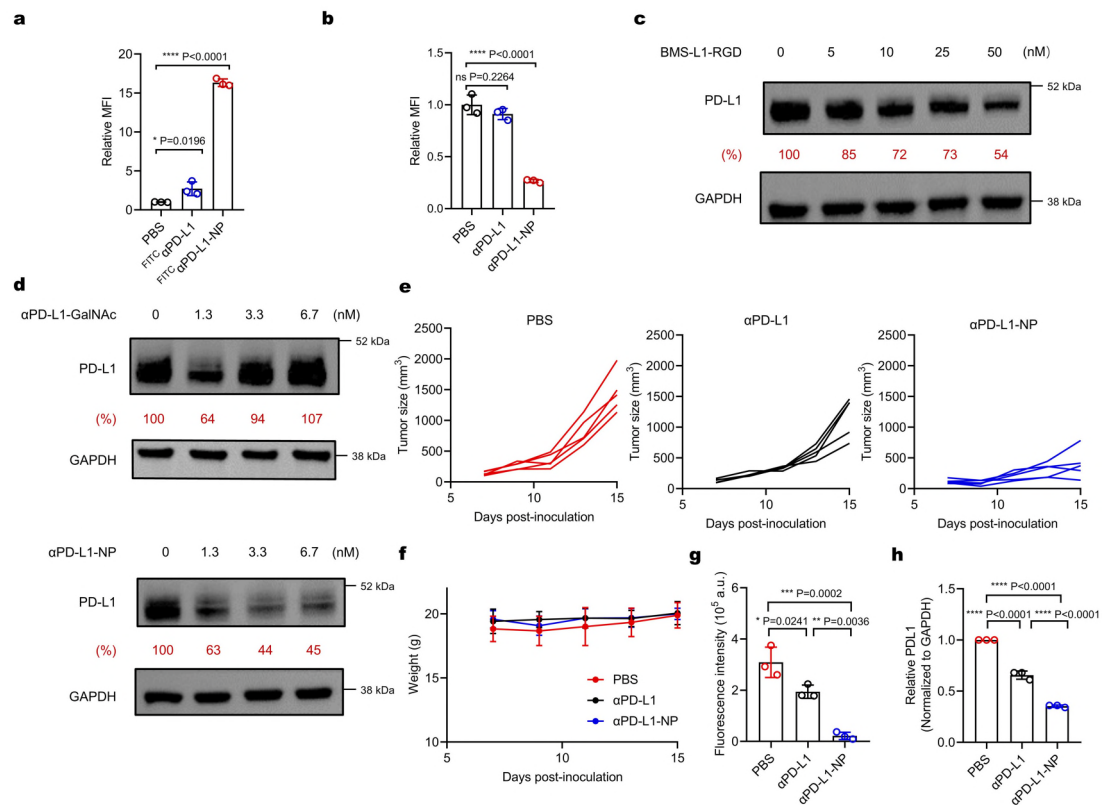

**Supplementary Fig. 8 Degradation of PD-L1 *in vitro* and *in vivo*.** **a**, Fold changes in MFI of the FITC signal in B16F10 cells with the treatment of <sup>FITC</sup> $\alpha$ PD-L1 (3.3 nM) or <sup>FITC</sup> $\alpha$ PD-L1-NP (<sup>FITC</sup>PD-L1-equiv., 3.3 nM) for 4 hours (n = 3 biologically independent experiments). **b**, Quantitative image analysis of PD-L1 degradation as shown in **Fig. 3e** (n = 3 biologically independent experiments). **c**, Western blot analysis of PD-L1 degradation in B16F10 cells after co-incubation with BMS-L1-RGD at the indicated concentrations for 24 hours. The blots are representative of n = 3 biological replicates. The uncropped blots are included in the Source Data file. **d**, Western blot analysis of PD-L1 degradation in Hepa1-6 cells after co-incubation with  $\alpha$ PD-L1-GalNAc or  $\alpha$ PD-L1-NP at the indicated concentrations for 24 hours. The blots are representative of n = 3 biological replicates. The samples derived from the same experiment and the blots were processed in parallel. The uncropped blots are included in the Source Data file. **e**, Tumor growth curves for individual mice in each treatment group (n = 5 mice per group). **f**, Average body weight change of mice in each group. **g**, Quantitative image analysis of the PD-L1 level in tumor sections as shown in **Fig. 3n** (n = 3 biologically independent experiments). **h**, Densitometric analysis of the PD-L1 band as shown in **Fig. 3o** (n = 3

---

biologically independent experiments). Data are presented as mean values  $\pm$  SD where relevant. *P* values were determined by one-way ANOVA with Tukey's multiple comparisons test. ns, no significant; \**p* < 0.05; \*\**p* < 0.01; \*\*\**p* < 0.001; \*\*\*\**p* < 0.0001. Source data are provided as a Source Data file.

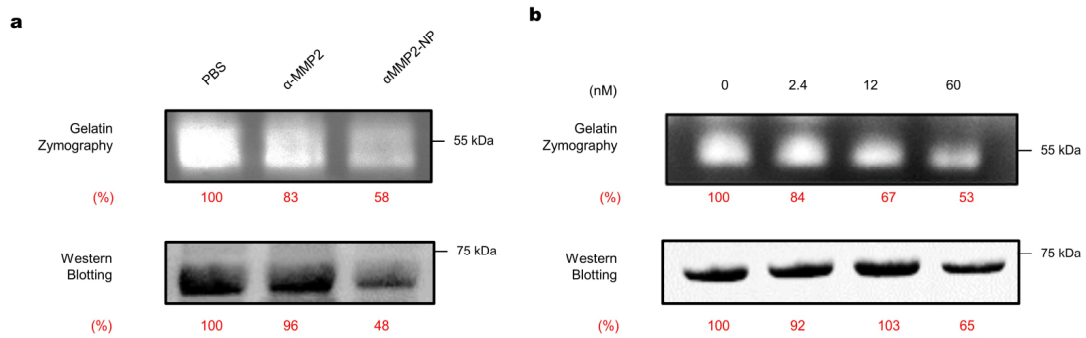

**Supplementary Fig. 9 Degradation of MMP2 mediated by  $\alpha$ MMP2-NP.** **a**, Gelatin zymography and Western blot analysis of the culture medium of MCF-7 cells after the treatment with PBS,  $\alpha$ MMP2 (12 nM), or  $\alpha$ MMP2-NP ( $\alpha$ -MMP2-equiv. 12 nM) for 12 hours. Equal amounts of the medium were applied to gel electrophoresis. The blots are representative of  $n = 3$  biological replicates. The uncropped blots and gels are included in the Source Data file. **b**, Gelatin zymography and Western blot analysis of the culture medium of MDAMB231 cells treated with varying concentrations of  $\alpha$ MMP2-NP for 12 hours. Equal amounts of the medium were applied to gel electrophoresis. The blots are representative of  $n = 3$  biological replicates. The uncropped blots and gels are included in the Source Data file. Source data are provided as a Source Data file.

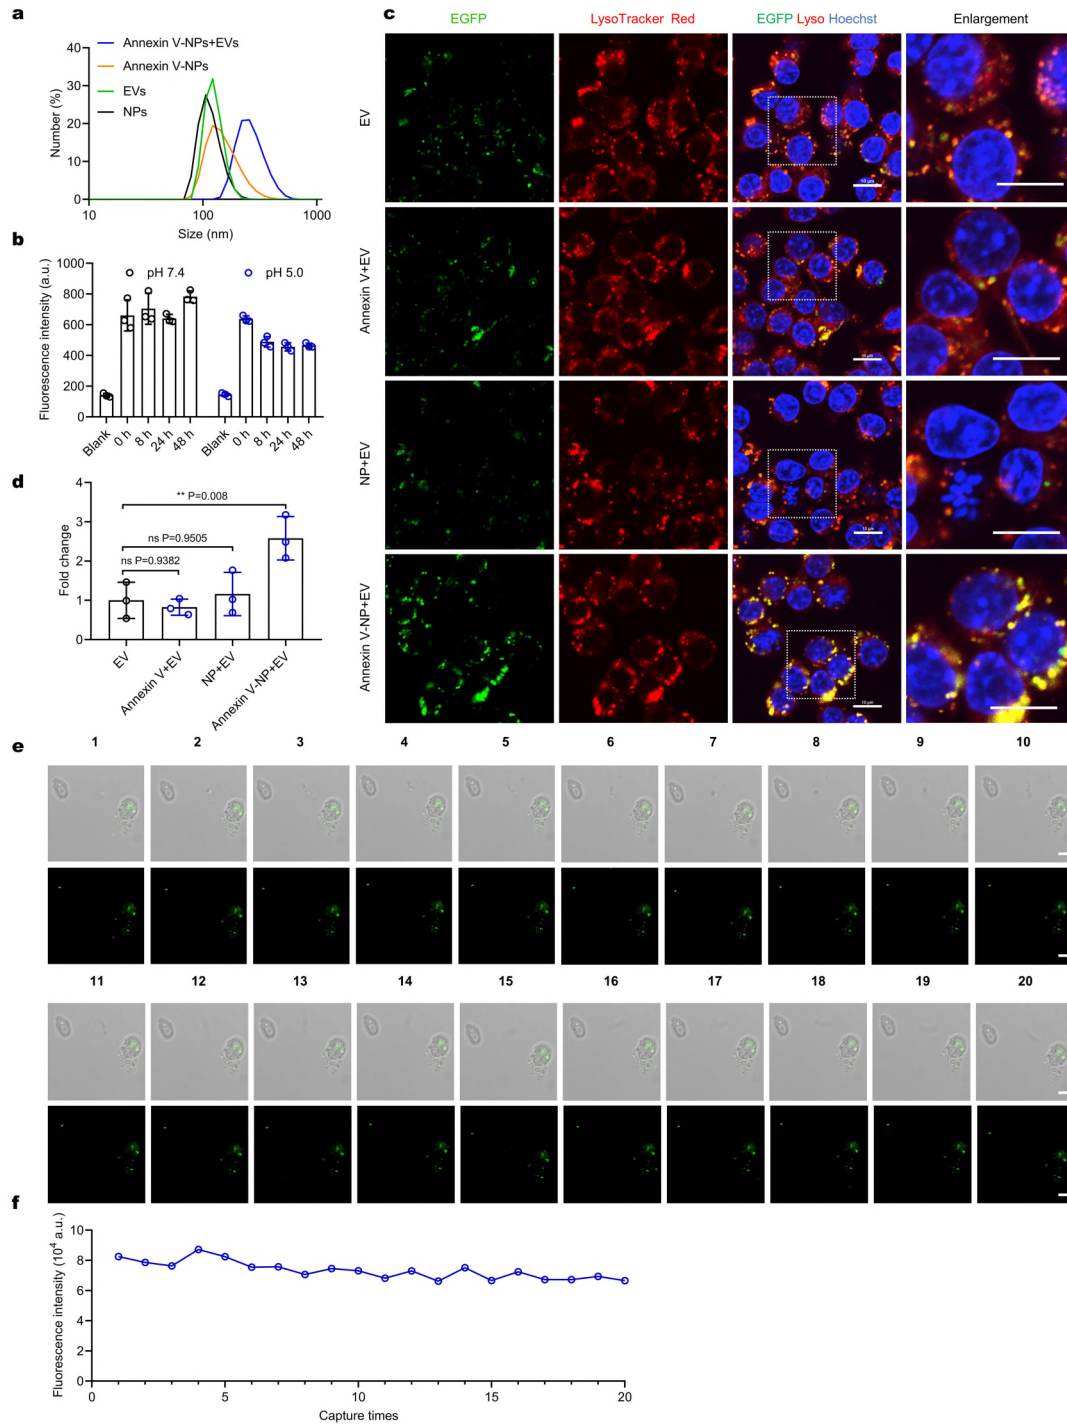

**Supplementary Fig. 10 Degradation of EVs mediated by Annexin V-NPs.** **a**, Particle size of NP, EV, Annexin V-NP, and Annexin V-NP + EV measured by DLS. **b**, Fluorescence intensity change of  $^{EGFP}$ EVs ( $6 \times 10^9$  particles  $mL^{-1}$ ) incubated at pH 7.4 or pH 5.0 for different durations (0, 8, 24 and 48 h) ( $n = 3$  biologically independent experiments). Blank refers to the background fluorescence in the buffer. **c**, Live-cell images of RAW264.7 cells incubated with EVs, Annexin-V + EVs, NPs + EVs, or



---

Annexin-V-NPs + EVs for 8 hours. The corresponding concentrations of EV, Annexin-V, and NP were  $1.3 \times 10^8$  particles  $\text{mL}^{-1}$ ,  $0.4 \mu\text{g mL}^{-1}$ , and  $50 \mu\text{g mL}^{-1}$ , respectively. Scale bar,  $10 \mu\text{m}$ . The images are representative of  $n = 3$  biological replicates. **d**, Fold changes in MFI of the EGFP signal as shown in **c** ( $n = 3$ ). **e**, Confocal tracking of the EGFP signal in ECDHCC1-PalmGRET cell debris with 20 rounds of image capture. Scale bar,  $5 \mu\text{m}$ . **f**, Quantitative image analysis of the EGFP signal as shown in **e**. *P* values were determined by one-way ANOVA with Dunnett's *post hoc* test. ns, no significance;  $**p < 0.01$ . Data are presented as mean values  $\pm$  SD where relevant. Source data are provided as a Source Data file.

**Supplementary Table 1. Comparison of existing approaches in terms PD-L1 degradation**

| Existing approach                      | Concentration                 | Duration    | Degradation   |
|----------------------------------------|-------------------------------|-------------|---------------|
| LYTAC <sup>1</sup>                     | 25 nM (Atz)                   | 48 h        | 73%           |
| GalNAc-LYTAC <sup>2</sup>              | 25 nM (Atz)                   | 48 h        | 7%            |
| Atz-EndoTag <sup>3</sup>               | 200 nM (Atz)                  | 48 h        | 77%           |
| Covalent LYTAC platform <sup>4</sup>   | 1 $\mu$ M (DBCO-PDL1 aptamer) | 12 h        | 72%           |
| KineTAC <sup>5</sup>                   | 100 nM (Atz)                  | 24 h        | 67%           |
|                                        | 50 nM (Atz)                   | 24 h        | 55%           |
|                                        | 10 nM (Atz)                   | 24 h        | 37%           |
| AbTAC <sup>6</sup>                     | 10 nM (Atz)                   | 24 h        | 63%           |
| IFLD <sup>7</sup>                      | 25 nM (BMS-8)                 | 24 h        | 73%           |
| PROTAB <sup>8</sup>                    | 13.3 nM (Atz)                 | 24 h        | near-complete |
| GlueTAC <sup>9</sup>                   | 100 nM                        | 12 h        | 89%           |
| SignalTAC <sup>10</sup>                | 100 nM (Az)                   | 48 h        | 55%           |
| CDTAC <sup>11</sup>                    | 6 $\mu$ M (BMS-1166)          | 24 h        | 76%           |
| IGF2-peptide based LYTAC <sup>12</sup> | 100 nM (C5 antibody)          | 22 h        | 55%           |
|                                        | 50 nM (C5 antibody)           | 22 h        | 75%           |
| ROTAC <sup>13</sup>                    | R2PD1 protein                 | 24 h        | 90%           |
| iLYTACs <sup>14</sup>                  | 200 nM                        | 48 h        | 55%           |
| TransTAC <sup>15</sup>                 | 25 nM (Atz Fab)               | /           | 98%           |
| GLP1-LYTAC <sup>16</sup>               | 100 nM (HS636)                | 48 h        | 82%           |
| LYTACA <sup>17</sup>                   | 100 $\mu$ M (fm-TPP)          | 12h         | 42%           |
|                                        | 100 $\mu$ M (nf-TPP)          | 12h         | 70%           |
| <b>MONOTAB</b>                         | <b>6.6 nM</b>                 | <b>24 h</b> | <b>92%</b>    |
|                                        | <b>3.3 nM</b>                 | <b>48 h</b> | <b>95%</b>    |

**Supplementary Table 2. Reagents and Sources**

| <b>Reagent</b>                                                                                         | <b>Source</b> | <b>Reagent</b>                                                  | <b>Source</b>  |
|--------------------------------------------------------------------------------------------------------|---------------|-----------------------------------------------------------------|----------------|
| Streptavidin-conjugated and carboxyl-functionalized polystyrene nanoparticles (25mg mL <sup>-1</sup> ) | XINQIAO Bio   | DAPI                                                            | Aladdin        |
| Rhodamine PEG Amine (RB-PEG <sub>2K</sub> -NH <sub>2</sub> )                                           | Ponsure       | Paraformaldehyde                                                | Aladdin        |
| Fluorescein PEG Amine (FITC-PEG <sub>2K</sub> -NH <sub>2</sub> )                                       | Ponsure       | Genistein                                                       | Aladdin        |
| Biotin-PEG4-NHS Ester                                                                                  | LEO Biochem   | Cytochalasin D                                                  | Aladdin        |
| BCA protein assay kit                                                                                  | Beyotime      | Filipin                                                         | Aladdin        |
| Membrane and cytosol protein extraction kit                                                            | Beyotime      | Chlorpromazine                                                  | Aladdin        |
| sodium dodecyl sulfate (SDS)                                                                           | Beyotime      | Pitstop 2                                                       | Aladdin        |
| Tween 20                                                                                               | Beyotime      | Wortmannin                                                      | Aladdin        |
| Tris-HCl (pH=7.5)                                                                                      | Beyotime      | Leupeptin                                                       | Macklin        |
| Gelatin from porcine skin                                                                              | Beyotime      | mitomycin C                                                     | Macklin        |
| Coomassie Blue Fast Staining Solution                                                                  | Beyotime      | Bafilomycin A1                                                  | TargetMol      |
| RIPA Lysis Buffer                                                                                      | Beyotime      | Triton-X-100                                                    | YUANYE Bio     |
| Phenylmethanesulfonyl fluoride (PMSF, 100 mM)                                                          | Beyotime      | 2×S6 Universal SYBR qPCR Mix                                    | EnzyArtisan    |
| BeyoECL Star                                                                                           | Beyotime      | HyperScript III 1st Strand cDNA Synthesis Kit with gDNA Remover | EnzyArtisan    |
| Crystal Violet Nonahydrate                                                                             | TCI           | RNAsimple Total RNA Kit                                         | TianGen        |
| RNAiMAX Transfection Reagent                                                                           | Thermo Fisher | CCK-8 assay kit                                                 | Meilunbio      |
| LysoTracker™ Green DND-26                                                                              | Thermo Fisher | Prestained Protein Ladder                                       | Meilunbio      |
| LysoTracker™ Red DND-99                                                                                | Thermo Fisher | Fetal bovine serum (FBS)                                        | Gibco          |
| Hoechst 33342                                                                                          | Thermo Fisher | 100×penicillin/streptomycin                                     | GENOM Bio      |
| RPMI-1640                                                                                              | Thermo Fisher | BMS8                                                            | MedChemExpress |
| DMEM                                                                                                   | Thermo Fisher | Tri-GalNAc(OAc) <sub>3</sub> -NH <sub>2</sub>                   | CincoBio       |
| Hexafluorophosphate Azabenzotriazole Tetramethyl Uronium (TATU)                                        | BidePharm     | 1-Ethyl-3-(3-dimethylaminopropyl)carbodiimide (EDCI)            | BidePharm      |
| N-Boc-1,3-propanediamine                                                                               | BidePharm     | 5-Hexynoic acid                                                 | BidePharm      |
| Imidazole-1-sulfonyl azide hydrochloride                                                               | BidePharm     | Tris(benzyltriazolylmethyl)amine (TBTA)                         | BidePharm      |
| cRGD                                                                                                   | BidePharm     | 4-Dimethylaminopyridine (DMAP)                                  | BidePharm      |
| NHS-C6-DBCO                                                                                            | BidePharm     | Sodium ascorbate (NaVc)                                         | BidePharm      |
| N-Hydroxysuccinimide (NHS)                                                                             | BidePharm     | N-boc-1,3-propanediamine                                        | Aikonchem      |
| Copper(I) bromide (CuBr)                                                                               | BidePharm     | NHS-(PEG) <sub>4</sub> -azide                                   | Aikonchem      |

**Supplementary Table 3. Antibody information and concentrations**

| <b>Antibody</b>                                   | <b>Source (#)</b>                 | <b>Usage, Dilution</b>                  |
|---------------------------------------------------|-----------------------------------|-----------------------------------------|
| Goat Anti-Rabbit IgG H&L (Biotin)                 | Abcam (ab97198)                   | Functional (6 nM)                       |
| Goat Anti-Mouse H&L (Biotin)                      | Abcam (ab207996)                  | Functional (6 nM)                       |
| Rabbit IgG                                        | Elabscience (E-AB-1128)           | Functional (0.6-12 nM)                  |
| Mouse IgG                                         | Abmart (B30010M)                  | Functional (0.6-12 nM)                  |
| Rabbit IgG-Cy5                                    | Yaji Biological                   | Functional (3.3 nM)                     |
| Anti-PDL1 antibody                                | Abcam (ab213480)                  | Functional (0.7-6.7 nM); WB, 1:1000     |
| Anti-PDL1 antibody                                | Proteintech (66248-1-Ig)          | IF, 1:200; WB, 1:1000                   |
| Anti-MMP2 antibody                                | Cell Signaling Technology (13132) | WB, 1:1000                              |
| Anti-MMP2 antibody                                | Abcam (ab92536)                   | Functional (2.4-60 nM); WB, 1:1000      |
| Biotin-Annexin V                                  | Biolegend (640904)                | Functional (0.4 $\mu\text{g mL}^{-1}$ ) |
| Annexin V-Biotin Reagent                          | Elabscience (E-CK-A110)           | Functional (8 $\mu\text{L mL}^{-1}$ )   |
| FITC Anti-mouse CD274/PD-L1 Antibody              | Elabscience (E-AB-F1132UC)        | Functional (3.3 nM)                     |
| Goat Anti-Mouse IgG H&L (Alexa Fluor® 647)        | Abcam (ab150115)                  | IF, 1:1000                              |
| Goat Anti-Rabbit IgG H&L (FITC conjugated)        | Elabscience (E-AB-1014)           | IF, 1:100                               |
| EEA1 (C45B10) Rabbit mAb                          | Cell Signaling Technology (3288)  | WB, 1:1000                              |
| Rab7 (D95F2)XP® Rabbit mAb                        | Cell Signaling Technology (9367)  | WB, 1:1000                              |
| LAMP1 (D2D11)XP® Rabbit mAb                       | Cell Signaling Technology (9091)  | IF, 1:400                               |
| CD107a / LAMP1 Monoclonal antibody                | Proteintech (67300-1-Ig)          | WB, 1:5000                              |
| Anti-GAPDH Recombinant Rabbit Monoclonal Antibody | HUABIO (ET16014)                  | WB, 1:1000                              |
| HRP-labeled Goat Anti-Rabbit IgG (H+L)            | Beyotime                          | WB, 1:2000                              |
| HRP-labeled Goat Anti-Mouse IgG (H+L)             | Beyotime                          | WB, 1:2000                              |

---

### Supplementary Table 4. RNA sequences and PCR primers

gRNA sequence (5' to 3')

|                         | Oligo1                    | Oligo2                    |
|-------------------------|---------------------------|---------------------------|
| Mouse <i>Igf2r</i> gRNA | CACCGATCAACGTGTGTAGAGACAT | AAACATGTCTCTACACACGTTGATC |
| Mouse <i>Tfrc</i> gRNA  | CACCGCTACACGCTTACAATAGCCC | AAACGGGCTATTGTAAGCGTGTAGC |

siRNA sequence (5' to 3')

|                           | Oligo1                | Oligo2                  |
|---------------------------|-----------------------|-------------------------|
| Mouse <i>Itgav</i> siRNA  | AAGGACUUUGGGAUUGGUUTT | AACCAUUCCTCAAAGUCCUUTT  |
| Mouse <i>Ackr3</i> siRNA  | UACACUACAUCCCGUUUACTT | GUAACGGGAUGUAGUGUATT    |
| Mouse <i>Ldlr</i> siRNA   | GCAACAUCUCUGGAAGAUUTT | AAUCUGUCCAGUAGAUGUUGCTT |
| Mouse <i>Gba1</i> siRNA   | ACGGAUUUGAAUUAACAUTT  | AUGUUUAUUCAAUUCGGUTT    |
| Mouse <i>Scarb1</i> siRNA | GGGAUGAACACUCGAAUUTT  | AAUUCGAGUUGUUCAUCCCTT   |
| Mouse <i>Vti1a</i> siRNA  | CAGAUGGAUUUGGAAGUUCTT | GAACUCCAAAUCCAUCUGTT    |

### PCR Primers

|                     | Forward sequence        | Reverse sequence         |
|---------------------|-------------------------|--------------------------|
| Mouse <i>Igf2r</i>  | GGGAAGCTGTTGACTCCAAAA   | GCAGCCCATAGTGGTGTGAA     |
| Mouse <i>Tfrc</i>   | GTTTCTGCCAGCCCTTATTAT   | GCAAGGAAAGGATATGCAGCA    |
| Mouse <i>Itgav</i>  | CCGTGGACTTCTTCGAGCC     | CTGTTGAATCAAACCTCAATGGGC |
| Mouse <i>Ackr3</i>  | GACCGCTATCTCTCCATCACCT  | GTTGGAAGCAGATGTGACCGTC   |
| Mouse <i>Ldlr</i>   | TGACTCAGACGAACAAGGCTG   | ATCTAGGCAATCTCGGTCTCC    |
| Mouse <i>Gba1</i>   | GCCAGTTGTGACTTCTCCATCC  | CGTGAGGACATCTTCAGGGCTT   |
| Mouse <i>Scarb1</i> | TTTGGAGTGGTAGTAAAAAGGGC | TGACATCAGGGACTCAGAGTAG   |
| Mouse <i>Vti1a</i>  | TGACATCAGGGACTCAGAGTAG  | CCCTTCCTTGAACCTATAAGCC   |

---

**Supplementary Table 5. Sequence of the used EGFP variant**

|                              |                                                                                                                                                                                                                                                                                                                                                                                                                                                                                                                                                                                                                                                                                                                                                                                                     |
|------------------------------|-----------------------------------------------------------------------------------------------------------------------------------------------------------------------------------------------------------------------------------------------------------------------------------------------------------------------------------------------------------------------------------------------------------------------------------------------------------------------------------------------------------------------------------------------------------------------------------------------------------------------------------------------------------------------------------------------------------------------------------------------------------------------------------------------------|
| Sense strand (5' to 3')      | ATGGTGAGCAAGGGCGAGGAGCTGTTACCGGGGTGGTGCCCATCCTGG<br>TCGAGCTGGACGGCGACGTAAACGGCCACAAGTTCAGCGTGTCCGGCGA<br>GGGCGAGGGCGATGCCACCTACGGCAAGCTGACCCTGAAGTTCATCTGC<br>ACCACCGGCAAGCTGCCCGTGCCCTGGCCCACCCTCGTGACCACCCTGA<br>CCTACGGCGTGCAGTGCTTACGCCGCTACCCCGACCACATGAAGCAGCAC<br>GACTTCTTCAAGTCCGCCATGCCCGAAGGCTACGTCCAGGAGCGCACCAT<br>CTTCTTCAAGGACGACGGCAACTACAAGACCCGCGCCGAGGTGAAGTTCG<br>AGGGCGACACCCTGGTGAACCGCATCGAGCTGAAGGGCATCGACTTCAA<br>GGAGGACGGCAACATCCTGGGGACAAGCTGGAGTACAACACTACAACAGCC<br>ACAACGTCTATATCATGGCCGACAAGCAGAAGAACGGCATCAAGGTGAACT<br>TCAAGATCCGCCACAACATCGAGGACGGCAGCGTGCAGCTCGCCGACCAC<br>TACCAGCAGAACACCCCATCGGGCAGCGCCCGTGTCTGCTGCCCGACAA<br>CCACTACCTGAGCACCCAGTCCGCCCTGAGCAAAGACCCCAACGAGAAGC<br>GCGATCACATGGTCTGCTGGAGTTCGTGACCGCCGCCGGGATCACTCTC<br>GGCATGGACGAGCTGTACAAG |
| Anti-sense strand (5' to 3') | CTTGACAGCTCGTCCATGCCGAGAGTGATCCCGCGGCGGTACCGAACT<br>CCAGCAGGACCATGTGATCGCGCTTCTCGTTGGGGTCTTTGCTCAGGGCG<br>GACTGGGTGCTCAGGTAGTGGTTGTCGGGCAGCAGCACGGGGCCGTCGC<br>CGATGGGGGTGTTCTGCTGGTAGTGGTCGGCGAGCTGCACGCTGCCGTCC<br>TCGATGTTGTGGCGGATCTTGAAGTTCACCTTGATGCCGTTCTTCTGCTTGT<br>CGGCCATGATATAGACGTTGTGGCTGTTGTAGTTGTACTIONCAGCTTGTGCC<br>CAGGATGTTGCCGTCCTCCTTGAAGTCGATGCCCTTCAGCTCGATGCGGTT<br>CACCAGGGTGTGCCCTCGAACTTCACCTCGGCAGGGTCTTGTAGTTGC<br>CGTCGTCCTTGAAGAAGATGGTGCCTCCTGGACGTAGCCTTCGGGCATG<br>GCGGACTTGAAGAAGTCGTGCTGCTTCATGTGGTCGGGTAGCGGCTGAA<br>GCACTGCACGCCGTAGGTCAGGGTGGTCACGAGGGTGGGCCAGGGCACG<br>GGCAGCTTGCCGGTGGTGCAGATGAACTTCAGGGTCAGCTTGCCGTAGGT<br>GGCATCGCCCTCGCCCTCGCCGGACACGCTGAACTTGTGGCCGTTTACGT<br>CGCCGTCCAGCTCGACCAGGATGGGCACCACCCCGGTGAACAGCTCCTC<br>GCCCTTGCTACCAT     |

---

## Supplementary methods

### Preparation of <sup>RB</sup>NP/ <sup>FITC</sup>NP

*Procedure for RB-biotin and FITC-biotin conjugation.* RB-PEG<sub>2K</sub>-amine (25.0 mg) or FITC-PEG<sub>2K</sub>-amine (100.0 mg) was mixed with biotin-PEG<sub>4</sub>-NHS (7.0 mg, 0.012 mmol) in an Eppendorf tube, and 1 mL of NaHCO<sub>3</sub> solution (pH ~8.5) was added. The reaction was incubated at room temperature in the dark for 8 hours and then filtered through a Sephadex G15 column to yield RB-PEG-Biotin and FITC-PEG-Biotin.

*Procedure for RB or FITC labelling of NP.* RB-PEG-Biotin (5 mM) or FITC-PEG-Biotin (20 mM) was mixed with a 25 mg mL<sup>-1</sup> solution of streptavidin-modified NPs (XINQIAO Bio, Hangzhou, China) at the ratio of 1:1 (v/v) and incubated on an incubator overnight, at 4 °C in the dark. The reaction mixture was then ultracentrifuged at 15,000 g for 5 minutes to pellet <sup>RB</sup>NPs or <sup>FITC</sup>NPs.

### Preparation of $\alpha$ Fc-NP and $\alpha$ Fc-<sup>RB</sup>NP

Biotinylated goat anti-rabbit or anti-mouse IgG H&L (1 mg mL<sup>-1</sup>) was mixed with NPs or <sup>RB</sup>NPs (25 mg mL<sup>-1</sup>) at the molar ratio of 1:1 and incubated on a shaker for 8 hours at 4 °C. The reaction mixture was then ultracentrifuged at 15,000 g for 5 minutes to pellet  $\alpha$ Fc-NPs or  $\alpha$ Fc-<sup>RB</sup>NPs.

### General procedure for preparation of MONOTABs

$\alpha$ Fc-NPs or  $\alpha$ Fc-<sup>RB</sup>NPs were mixed with control IgG or targeted antibodies at the  $\alpha$ Fc:IgG molar ratio of 1:2, unless otherwise described, and incubated on a shaker for 2 hours at 4°C. The reaction mixture was ultracentrifuged at 15,000 g for 5 minutes to pellet MONOTABs.

### Cytotoxicity of NP and $\alpha$ Fc-NP against B16F10 cells

B16F10 cells were plated into a 96-well plate (5,000 cells per well) one day before the experiment and then incubated with serial concentrations of NP or  $\alpha$ Fc-NP for 24 hours. Subsequently, culture medium in each well was replaced with 80  $\mu$ L of the CCK-8 solution (Meilunbio, # MA0218-3) and incubated for 3 hours. The absorbance at 450

---

nm of each well was measured using a Synergy H1 microplate reader (BioTek). The cell viability was calculated as previously described.

### **Clathrin knockdown with siRNA**

Cells were plated in a 6-well plate (400,000 cells per well) one day before the experiment and then transfected with 120 nM of clathrin siRNA (s476: 5'-CGGUUGCUCUUGUUACGGATT-3', GenePharma) and Lipofectamine RNAiMAX (Invitrogen) according to the manufacturers' instructions. A non-specific Silencer Select siRNA (NC-siRNA) was used as the negative control.

### **Cell sample processing for TEM analysis**

*Double fixation.* Cell samples were first fixed with 2.5% glutaraldehyde in phosphate buffer (0.1 M, pH 7.0) for more than 4 hours. The samples were then washed with phosphate buffer (0.1 M, pH 7.0) three times for 15 minutes each. Postfixation was performed with 1% OsO<sub>4</sub> in phosphate buffer (0.1 M, pH 7.0) for 1-2 hours, followed by three 15-minute washes with phosphate buffer (0.1 M, pH 7.0).

*Dehydration.* The fixed samples were first dehydrated using a graded series of ethanol (30%, 50%, 70%, and 80%) for 15 minutes each, followed by a graded series of acetone (90% and 95%) for 15 minutes each. Afterward, the samples were dehydrated twice using absolute acetone for 20 min respectively.

*Infiltration.* The specimen was placed in a 1:1 mixture of absolute acetone and the final Spurr resin mixture for 1 hour at room temperature. Afterward, the specimen was transferred to a 1:3 mixture of absolute acetone and the final resin mixture for 3 hours and then placed in the final Spurr resin mixture overnight.

*Embedding, ultrathin sectioning, staining and examination.* The specimen was placed in an Eppendorf tube containing the Spurr resin and heated at 70°C for more than 9 hours. Subsequently, the specimen was sectioned using the Leica EM UC7 ultratome. The sections were stained with uranyl acetate for 5 minutes and alkaline lead citrate for 10 minutes, respectively. The sections were examined using a Hitachi H-7650 TEM.



---

### **Confocal microscopy for lysosome biogenesis**

B16F10 cells were seeded into a Nunc glass bottom dish (100,000 cells per dish) one day before the experiment and then incubated with IgG ( $2 \mu\text{g mL}^{-1}$ ), IgG ( $2 \mu\text{g mL}^{-1}$ ) +  $\alpha\text{Fc}$  ( $2 \mu\text{g mL}^{-1}$ ), IgG ( $2 \mu\text{g mL}^{-1}$ ) + NP ( $50 \mu\text{g mL}^{-1}$ ), or IgG ( $2 \mu\text{g mL}^{-1}$ ) +  $\alpha\text{Fc-NP}$  ( $50 \mu\text{g mL}^{-1}$ ) for 10 hours. Subsequently, the cells were washed with PBS, fixed with methanol for 5 minutes, and washed with PBS three times. After blocking with 10% goat serum for 1 hour at room temperature, the samples were incubated with a 1:400 dilution of rabbit LAMP1 monoclonal antibody (CST, #9091T) overnight at  $4^\circ\text{C}$  and then a 1:1000 dilution of FITC-conjugated goat anti-rabbit IgG (Elabscience, #E-AB-1014) for 1 hour at room temperature. After washing with PBS, the cells were stained with DAPI ( $2 \mu\text{g mL}^{-1}$ ) for 20 minutes, washed, and imaged using a Nikon AX R confocal microscope. DAPI was excited using a 405 nm laser and visualized at 427~475 nm; FITC was excited using a 488 nm laser and visualized at 505~544 nm.

### **NP-mediated <sup>FITC</sup> $\alpha\text{PD-L1}$ internalization**

B16F10 cells were seeded into a Nunc glass bottom dish (100,000 cells per dish) one day before the experiment and then incubated with 3.3 nM of <sup>FITC</sup> $\alpha\text{PD-L1}$  or <sup>FITC</sup> $\alpha\text{PD-L1-NP}$  for 4 hours. Subsequently, the cells were washed with PBS three times and incubated with 2  $\mu\text{M}$  of Hoechst 33342 for 30 minutes and 100 nM of LysoTracker DND99 for 15 minutes. After washing with PBS three times, the cells were imaged using a Nikon AX R confocal microscope. FITC was excited using a 488 nm laser and visualized at 505~544 nm.

### **Confocal microscopy for PD-L1 degradation**

B16F10 cells were seeded into a Nunc glass bottom dish (100,000 cells per dish) one day before the experiment and then incubated with 3.3 nM of  $\alpha\text{PD-L1-NP}$  or control treatments for 24 hours. Subsequently, the cells were washed with PBS, fixed with 4% paraformaldehyde (PFA) for 15 minutes, and washed with PBS three times. After permeabilization with 0.1% Triton X-100 for 15 minutes at room temperature, the cells were blocked in 10% goat serum in PBS for 1 hour at room temperature and incubated

---

with a 1:200 dilution of mouse PD-L1/CD274 monoclonal antibody (Proteintech, #66248-1) for 2 hours at room temperature. After washing with PBS, the cells were incubated with a 1:1000 dilution of Alexa Fluor 647-conjugated goat anti-mouse IgG (Abcam, #ab150115) for 1 hour at room temperature. Following another round of washing with PBS, the cells were stained with DAPI ( $2 \mu\text{g mL}^{-1}$ ) for 20 minutes. The cells were then washed with PBS and imaged using a Nikon AX R confocal microscope. DAPI was excited using a 405 nm laser and visualized at 427~475 nm; Alexa Fluor 647 was excited using a 639 nm laser and visualized at 662~737 nm.

### **Immunofluorescence of PD-L1 in tumor sections**

The collected tumor tissues were embedded in optimal cutting temperature (OCT) compound (Sakura, #4583), then snap-frozen in liquid nitrogen and Cryo-sectioned into 4- $\mu\text{m}$ -thick slices. The sections were immersed in ethanol for 10 minutes and washed three times with PBS for 5 minutes each. Antigen recovery was performed by heating the sections in the Tris-EDTA retrieval solution (HaoKebio, HKI0004) at 95-100 °C for 10 minutes. After cooling to room temperature, the sections were washed three times with PBS for 5 minutes each and then treated with 3%  $\text{H}_2\text{O}_2$  for 25 minutes at room temperature to inactivate endogenous peroxidase, followed by three washes with PBS. Subsequently, the sections were blocked with 3% BSA for 30 minutes, then incubated overnight at 4 °C with  $\alpha\text{PD-L1}$  antibody (Abcam, ab213480). After three washes with PBS, the sections were incubated with polyHRP-conjugated secondary antibody (HaoKebio, HKI0029) for 50 minutes, washed three times with PBS and then stained with Fare signal amplifier (Flare 570, HaoKebio, HKI0015) for 3-5 minutes. Following three washes with PBS, the sections were stained with DAPI for 8 minutes and washed three times with PBS. The slides were sealed with Antifade Mounting Medium (HaoKebio, HKI0007-1) and imaged using a Nikon AX R confocal microscope. DAPI was excited using a 350 nm laser and visualized at 420 nm; Flare 570 was excited using a 550 nm laser and visualized at 570 nm.

### **MMP2 content analysis by Western blot**

---

Cells were plated in a 6-well plate (200,000 cells per) and incubated in full medium for 24 hours. Subsequently, the medium was replaced with a serum-free medium and the cells were cultured for an additional 24 hours. Afterward, the cells were incubated with  $\alpha$ MMP2-NP or control treatment for 12 hours. The medium was collected and concentrated with a Millipore centrifugal filter unit (3 kDa MWCO). The protein concentration in the concentrated samples was determined using the BCA assay. Subsequently, the samples were applied to Western blot analysis or gelatin zymography as described below.

### **Production of <sup>EGFP</sup>EVs**

*Procedure for generating ECDHCC1-PalmGRET cells.* ECDHCC1 cells were transfected with pLenti-PalmGRET-EGFP plasmids (Addgene plasmid #158221) using a lentiviral vector. The engineered cell line was designated as ECDHCC1-PalmGRET and maintained in high-glucose DMEM supplemented with 10% FBS and 1% penicillin/streptomycin.

*Procedure for isolating <sup>EGFP</sup>EVs.* Prior to EV isolation, ECDHCC1-PalmGRET cells were plated at a density of 1000,000 cells per cm<sup>2</sup> and cultured in high-glucose DMEM supplemented with 10% EV-depleted FBS. To obtain the conditioned medium, the cells were collected at 80–90% confluency and subjected to sequential centrifugation at 300 g and 2000 g at 4 °C for 10 minutes to remove cells and cell debris, respectively. The conditioned medium was then ultracentrifuged at 100,000 g at 4 °C for 70 minutes to pellet the <sup>EGFP</sup>EVs. The <sup>EGFP</sup>EV pellet was resuspended in double-0.10  $\mu$ m-filtered PBS. Fresh <sup>EGFP</sup>EV aliquots were stored at –80 °C or subjected to Nanoparticle Tracking Analysis for measuring the particle concentration.

### **Photobleaching test of <sup>EGFP</sup>EVs**

ECDHCC1-PalmGRET cell debris were transferred into a Nunc glass bottom dish and imaged locally with continuous laser scanning using a confocal microscope. EGFP was excited using a 488 nm laser and visualized at 505~544 nm.

## Fluorescence analysis of EV endocytosis and exocytosis

Cells were plated in a 6-well plate (200,000 cells per well) one day before the experiment and then incubated with EVs ( $1.3 \times 10^8$  particles  $\text{mL}^{-1}$ ), Annexin-V ( $0.4 \mu\text{g mL}^{-1}$ ) + EVs, NPs ( $50 \mu\text{g mL}^{-1}$ ) + EVs, or Annexin-V-NPs (Annexin-V-equiv.  $0.4 \mu\text{g mL}^{-1}$ , NP-equiv.  $50 \mu\text{g mL}^{-1}$ ) + EVs for 8 hours. Subsequently, the culture medium was collected and the cells were further cultured in fresh serum-free medium for 10 hours. The fluorescence intensity of the collected medium was measured using a microplate spectrophotometer for analysis of *EGFP* EV endocytosis. After 10-hour incubation, the serum-free medium was also collected for analysis of *EGFP* EV exocytosis. EGFP was excited by 488 nm laser and visualized at 540 nm.

## Synthetic procedures

*Synthesis of Biotin-cRGD.* Biotin-cRGD was synthesized following the previously described methods with modifications<sup>7</sup>.

### 1) Synthesis of alkyne-cRGD

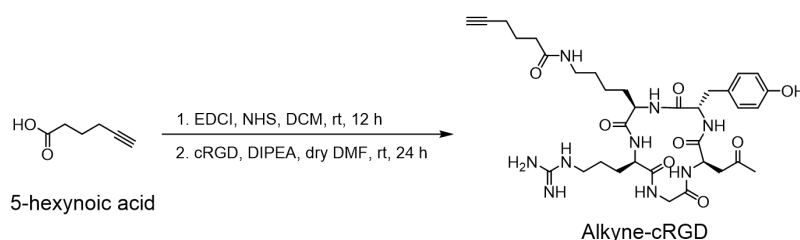

The synthesis of alkyne-cRGD involves two reactions. First, EDCI (920 mg, 4.8 mmol) and NHS (552 mg, 4.8 mmol) were added to the solution of 5-hexynoic acid (449 mg, 4.0 mmol) in DCM (20 mL). The reaction was allowed to stir at room temperature for 12 hours, followed by removal of solvent under vacuum. The mixture was resuspended in water (10 mL) and extracted with DCM three times. The combined organic phase was dried over anhydrous  $\text{Na}_2\text{SO}_4$ , filtered, and concentrated under vacuum to give the intermediate product. The intermediate product (62 mg, 0.23 mmol) was then mixed with cRGD (11.4 mg, 0.014 mmol) and DIPEA (15.5  $\mu\text{L}$ , 0.09 mmol) in anhydrous DMF (0.5 mL). After stirring at room temperature under  $\text{N}_2$  atmosphere for 24 hours, the solvent was removed under vacuum and the crude product was purified by RP-HPLC (5-45 min: 0-100% ACN,  $t_{\text{R}} = 17.5$  min) to afford alkyne-cRGD. MS (ESI)

m/z: calcd. for C<sub>33</sub>H<sub>47</sub>N<sub>9</sub>O<sub>9</sub> [M+H]<sup>+</sup> 714.34, found 714.10.

## 2) Synthesis of Biotin-L1- NHBoc

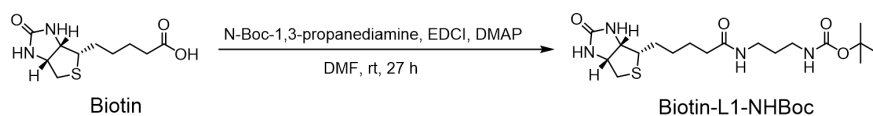

EDCI (2.15 g, 2.24 mmol) was added to the mixture of biotin (2.17 g, 1.78 mmol), N-Boc-1,3-propanediamine (1.54 g, 1.77 mmol), and DMAP (0.13 g, 0.21 mmol) in DMF (80 mL). After stirring at room temperature for 27 hours, the solvent was evaporated under vacuum and the residue was purified by flash column chromatography on silica to afford BMS8-L1-NHBoc as a white solid (3.28 g, 93%). <sup>1</sup>H NMR (400 MHz, Methanol-*d*<sub>4</sub>) δ 4.49 (dd, *J* = 7.9, 4.9 Hz, 1H), 4.31 (dd, *J* = 8.0, 4.5 Hz, 1H), 3.24-3.18 (m, 3H), 3.06 (t, *J* = 6.8 Hz, 2H), 2.93 (dd, *J* = 12.8, 5.0 Hz, 1H), 2.70 (d, *J* = 12.7 Hz, 1H), 2.20 (t, *J* = 7.4 Hz, 2H), 1.78-1.55 (m, 6H), 1.47-1.42 (m, 11H).

## 3) Synthesis of Biotin-L1- azide

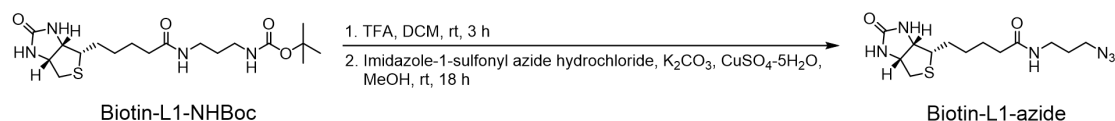

Biotin-L1-NHBoc (1.60 g, 4 mmol) was dissolved in a solution of DCM (34 mL) and TFA (17 mL). After stirring at room temperature for 2 hours, the solvent was evaporated under vacuum and the intermediate product was redissolved in 20 mL of MeOH, followed by the addition of imidazole-1-sulfonyl azide hydrochloride (1.01 g, 4.8 mmol), K<sub>2</sub>CO<sub>3</sub> (4.42 g, 32 mmol), and CuSO<sub>4</sub>·5H<sub>2</sub>O (0.04 g, 0.16 mmol). The reaction was allowed to stir at room temperature for 18 hours. Subsequently, the mixture was filtered through celite and the filtrate was concentrated under vacuum. The residue was purified by flash column chromatography on silica to afford Biotin-L1-azide as a white solid (1.29 g, 98%). <sup>1</sup>H NMR (400 MHz, Methanol-*d*<sub>4</sub>) δ 7.23 (s, 1H), 4.49 (dd, *J* = 7.9, 4.8 Hz, 1H), 4.30 (dd, *J* = 7.9, 4.5 Hz, 1H), 3.81 (s, 1H), 3.36 (t, *J* = 6.7 Hz, 2H), 3.27-3.16 (m, 3H), 2.93 (dd, *J* = 12.8, 5.0 Hz, 1H), 2.71 (d, *J* = 12.7 Hz, 1H), 2.21 (t, *J* = 7.4 Hz, 2H), 1.82-1.54 (m, 6H), 1.49-1.40 (m, 2H).

## 4) Synthesis of biotin-cRGD

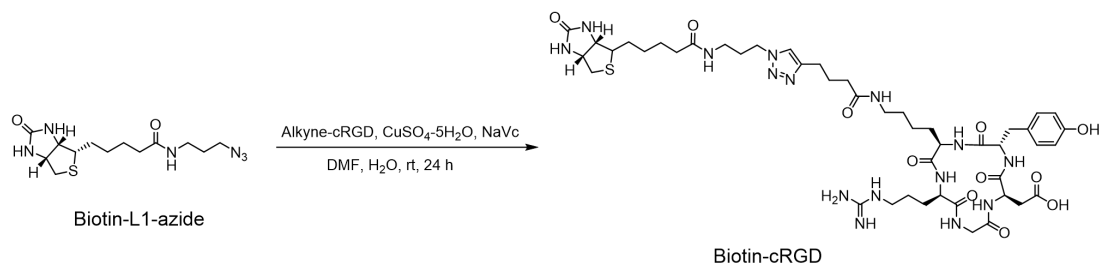

An aqueous solution (1.35 mL) containing  $\text{CuSO}_4\cdot 5\text{H}_2\text{O}$  (1.9 mg, 0.008 mmol) and NaVc (10 mg, 0.05 mmol) were added to the mixture of Biotin-L1-azide (5.3 mg, 0.016 mmol) and alkyne-cRGD (9 mg, 0.013 mmol) in DMF (0.45 mL). After stirring at room temperature for 24 hours, the mixture was directly purified by RP-HPLC (5-35 min: 0-50% ACN,  $t_R = 20.6$  min) to afford biotin-cRGD as a white powder after free-drying. MS (ESI)  $m/z$ : calcd. for  $\text{C}_{46}\text{H}_{69}\text{N}_{15}\text{O}_{11}\text{S}$   $[\text{M}+\text{CF}_3\text{COO}]^-$  1152.50, found 1152.20.

### Synthesis of BMS-L1-RGD

#### 1) Synthesis of BMS8-L1-azide

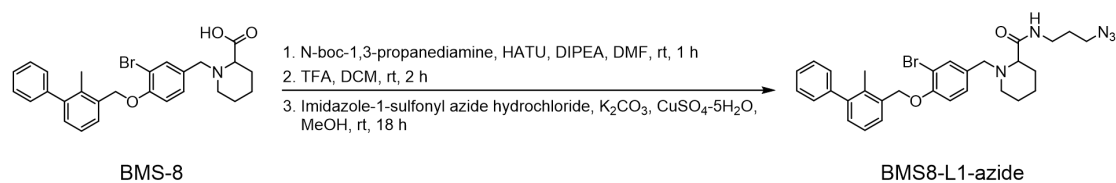

The synthesis of BMS8-L1-azide involves three reactions. First, DIPEA (87  $\mu\text{L}$ , 0.50 mmol) was added to a mixture of BMS-8 (50 mg, 0.10 mmol), N-boc-1,3-propanediamine (19 mg, 0.11 mmol), and HATU (38 mg, 0.10 mmol) in anhydrous DMF (4.0 mL). The solution was stirred at room temperature under  $\text{N}_2$  atmosphere for 1 hour and then concentrated under vacuum. The intermediate product was obtained by flash column chromatography on silica and then reacted with TFA (320  $\mu\text{L}$ ) in DCM (1.3 mL) at room temperature for 2 hours. After removal of TFA under vacuum, the residue was redissolved in MeOH, followed by the addition of imidazole-1-sulfonyl azide hydrochloride (63 mg, 0.30 mmol),  $\text{K}_2\text{CO}_3$  (4 mg, 0.60 mmol), and  $\text{CuSO}_4\cdot 5\text{H}_2\text{O}$  (0.8 mg, 0.003 mmol). The reaction was allowed to stir at room temperature for 18 hours and then concentrated under vacuum. The mixture was purified by flash column chromatography on silica to afford BMS8-L1-azide as a white solid (41 mg, 70%). MS (ESI)  $m/z$ : calcd. for  $\text{C}_{30}\text{H}_{34}\text{BrN}_5\text{O}_2$   $[\text{M}+\text{H}]^+$  576.20, found 576.00.

## 2) Synthesis of BMS-L1-RGD.

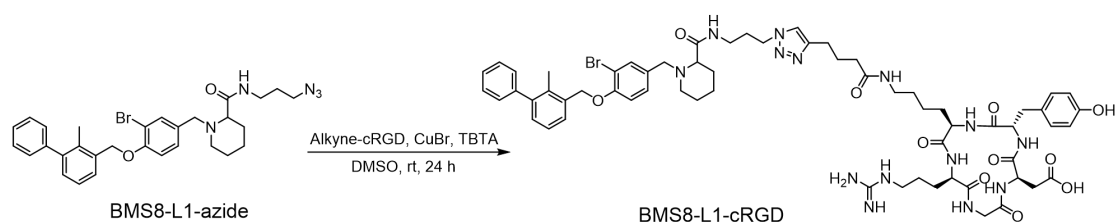

BMS8-L1-cRGD was synthesized following the previously described methods with modification<sup>7</sup>. BMS8-L1-azide (6.44 mg, 11.2  $\mu\text{mol}$ ), alkyne-cRGD (8.04 mg, 11.2  $\mu\text{mol}$ ), CuBr (3.2 mg, 22.4  $\mu\text{mol}$ ), and TBTA (12 mg, 22.4  $\mu\text{mol}$ ) were dissolved in 0.5 mL DMSO under  $\text{N}_2$  atmosphere. The solution was stirred at room temperature for 24 hours, and the mixture was directly purified by RP-HPLC (5-23 min: 0-45% ACN, 23-33 min: 45% ACN,  $t_{\text{R}} = 26.5$  min) to afford BMS-L1-cRGD as a white powder after free-drying. MS (ESI)  $m/z$ : calcd. for  $\text{C}_{63}\text{H}_{81}\text{BrN}_{14}\text{O}_{11}$   $[\text{M}+\text{H}]^+$  1291.54, found 1291.80;  $[\text{M}+2\text{H}]^{2+}$  646.28, found 646.40;  $[\text{M}+2\text{K}+\text{Na}]^{3+}$  463.82, found 463.40.

## Synthesis of $\alpha\text{PD-L1-GalNAc}$

### 1) Synthesis of Tri-GalNAc(OAc)<sub>3</sub>-DBCO

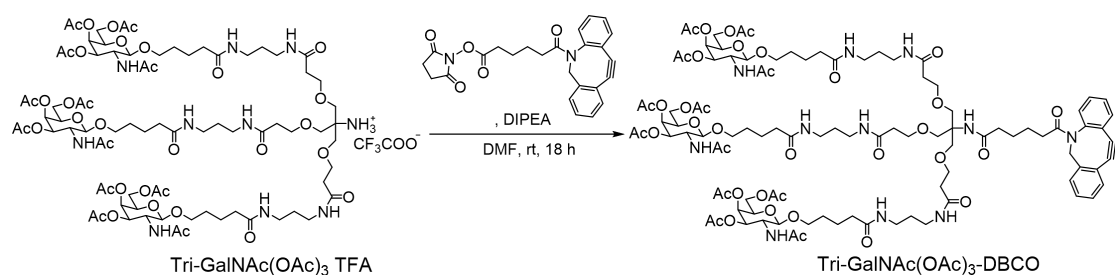

Tri-GalNAc(OAc)<sub>3</sub>-DBCO was synthesized following the previously described methods with modification<sup>2</sup>. DIPEA (35  $\mu\text{L}$ , 0.2 mmol) was added to the mixture of Tri-GalNAc(OAc)<sub>3</sub> TFA (100 mg, 0.053 mmol) and NHS-C<sub>6</sub>-DBCO (22 mg, 0.05 mmol) in DMF (600  $\mu\text{L}$ ). After stirring at room temperature for 18 hours, the solvent was evaporated under vacuum and the residue was purified by flash column chromatography on silica to afford Tri-GalNAc(OAc)<sub>3</sub>-DBCO as a white solid (43 mg, 37%). HRMS (ESI)  $m/z$ : calcd. for  $\text{C}_{100}\text{H}_{145}\text{N}_{11}\text{O}_{38}$   $[\text{M}+2\text{H}]^{2+}$  1055.4966, found 1055.4991;  $[\text{M}+3\text{H}]^{3+}$  704.0002, found 704.0006.

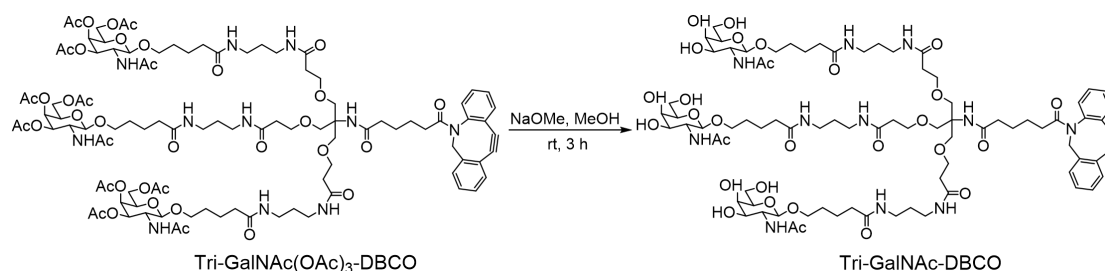

Tri-GalNAc(OAc)<sub>3</sub>-DBCO (60.6 mg, 0.03 mmol) was dissolved in methanol (0.58 mL) and 0.5 M of sodium methoxide in MeOH was added until pH reached 9~10. The reaction was allowed to stir at room temperature for 3 hours. Upon completion, the reaction was quenched with formic acid and concentrated under vacuum to give Tri-GalNAc-DBCO. The product was used directly without further purification.

## 2) Synthesis of $\alpha$ PD-L1-GalNAc

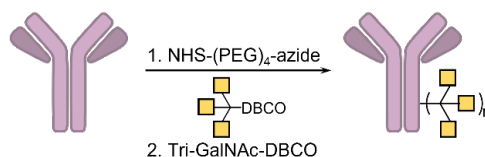

Antibody azide labeling.  $\alpha$ PD-L1 (BioXCell, BE0101) was mixed with 25 equiv. of NHS-(PEG)<sub>4</sub>-azide (20 mg mL<sup>-1</sup> in DMSO). After incubation overnight at room temperature, the mixture was filtered through a 30K ultrafiltration spin column to yield  $\alpha$ PD-L1-(PEG)<sub>4</sub>-azide.

Antibody GalNAc labeling. Tri-GalNAc-DBCO (100 equiv.) was weighed into an Eppendorf tube, and a solution of  $\alpha$ PD-L1-(PEG)<sub>4</sub>-N<sub>3</sub> (2 mg mL<sup>-1</sup>) was added. The solution was allowed to incubate at room temperature in the dark for 3 days and was filtered through a 30K ultrafiltration spin column to give  $\alpha$ PD-L1-GalNAc.



# <sup>1</sup>H NMR spectra

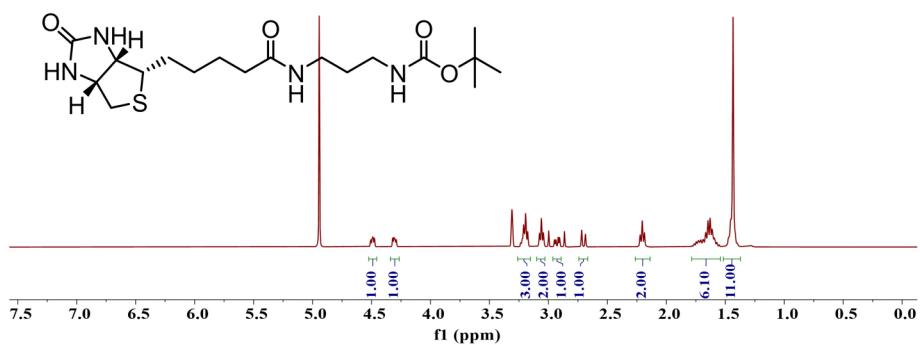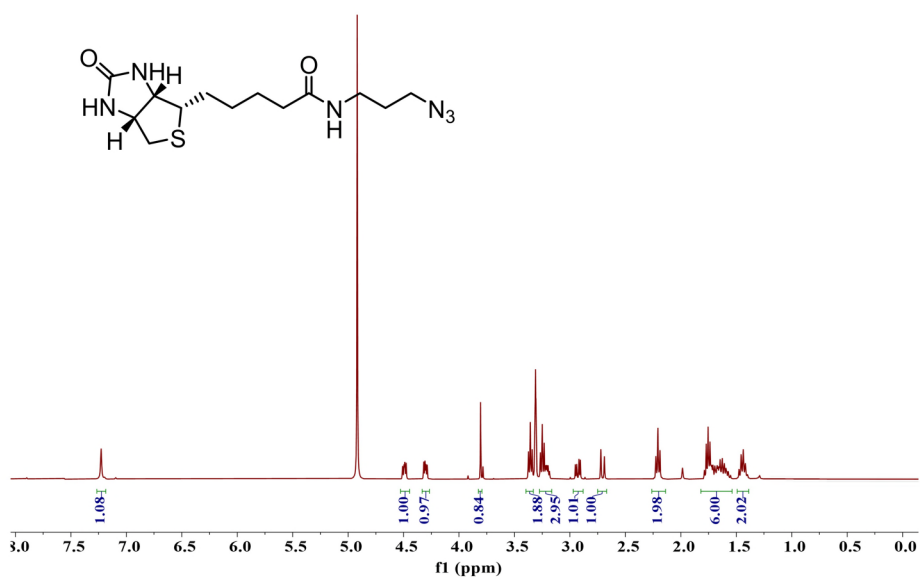

## MS spectra

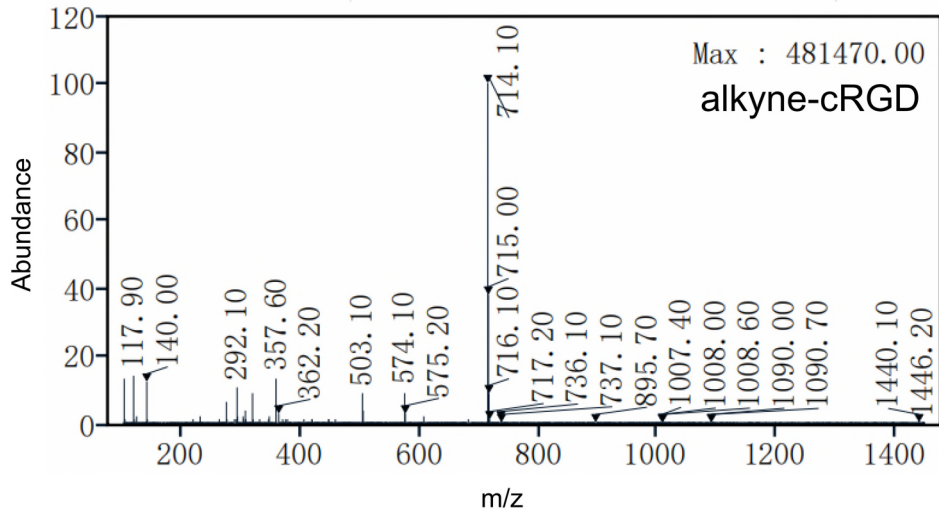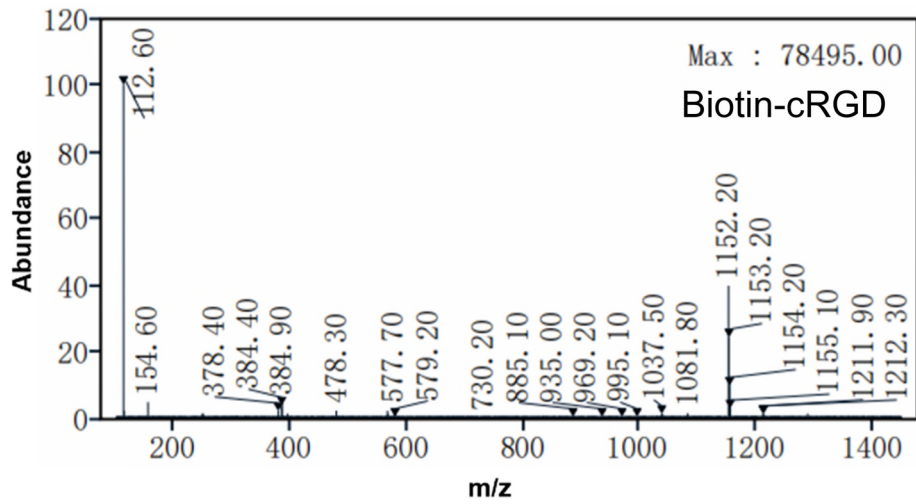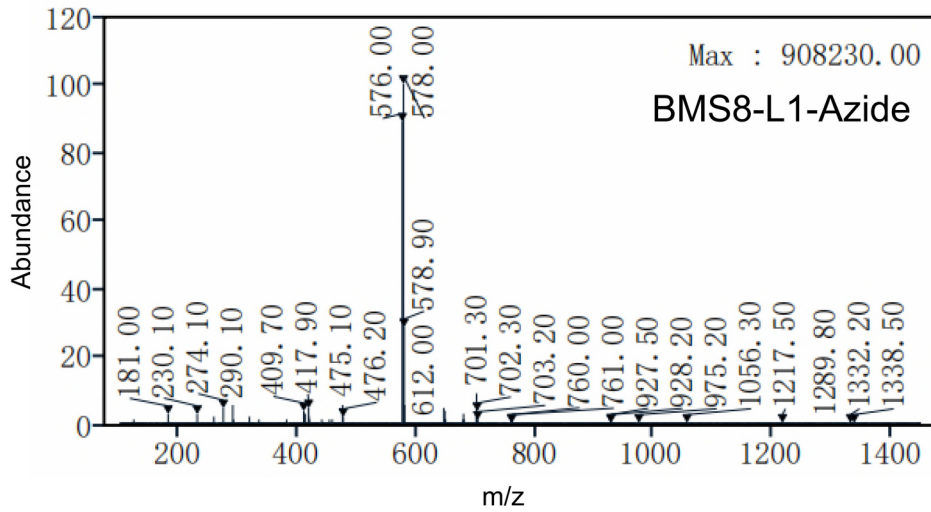

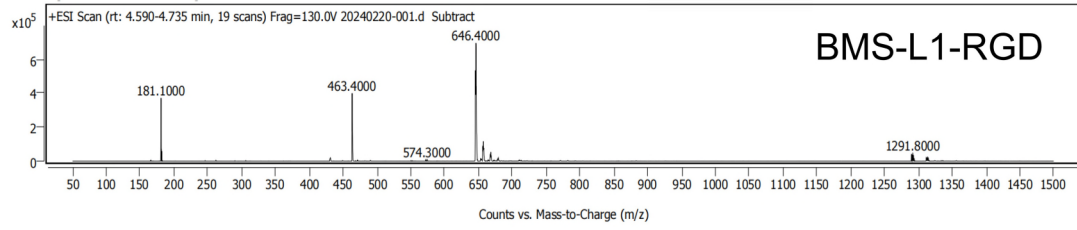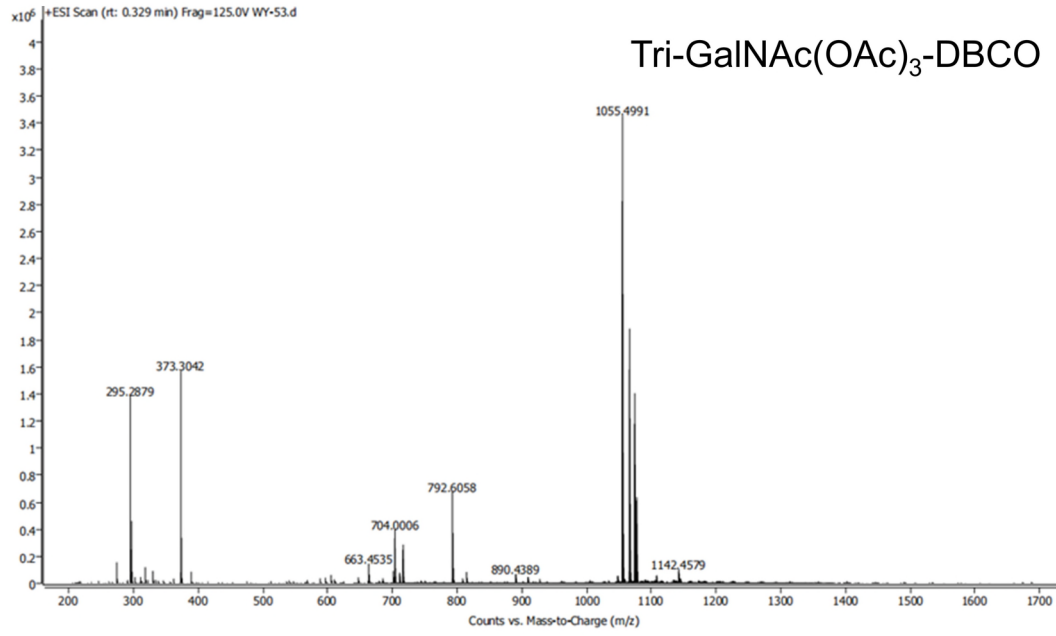

# MALDI-TOF-MS spectra

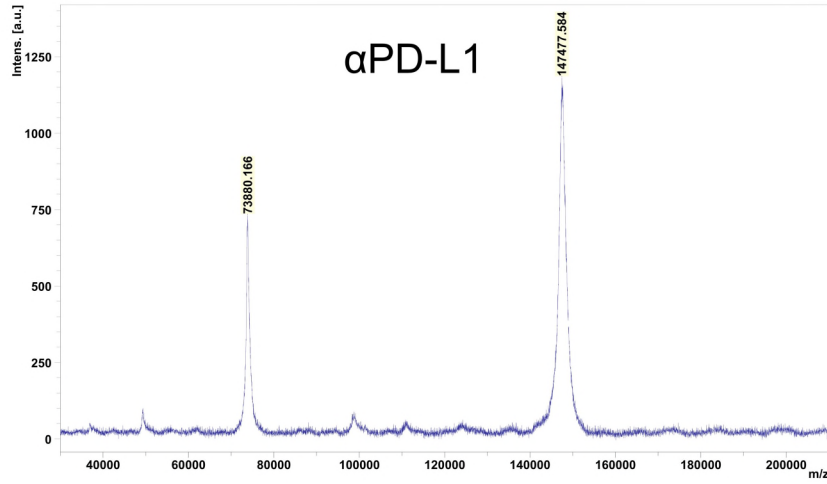

**Target**  
Target type 0280784  
Target serial number 1002475  
Position M4

**Laser**  
Laser beam attenuation 0  
Laser beam focus 8  
Laser repetition rate 2000 Hz  
Number of shots 9000

**Spectrometer**  
positive voltage polarity POS  
PIE delay 550 ns  
ion source voltage 1 20 kV  
ion source voltage 2 18.8 kV  
Lens voltage 6.8 kV  
Linear detector voltage 3.951 kV  
Deflection on  
Deflection mass  
Reflector voltage 1 0 kV  
Reflector voltage 2 0 kV  
Reflector detector volt. 2.542 kV

**Instrument**  
Instrument type ultraflexTOF/TOF  
Instrument serial 8276601.00598  
Name of computer UTX-00598  
Operator ID or name BDAL@DE  
flexControl version flexControl 3.4.135.0  
flexAnalysis version

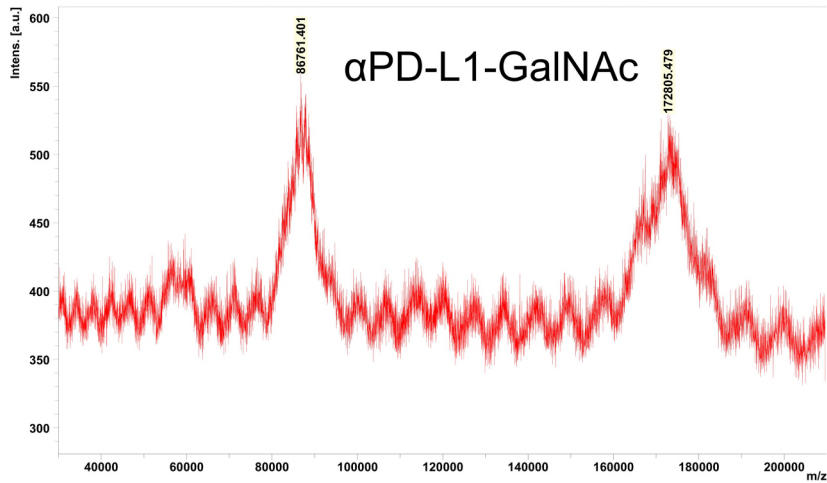

**Target**  
Target type 0280784  
Target serial number 1002475  
Position N4

**Laser**  
Laser beam attenuation 0  
Laser beam focus 8  
Laser repetition rate 2000 Hz  
Number of shots 21000

**Spectrometer**  
positive voltage polarity POS  
PIE delay 550 ns  
ion source voltage 1 20 kV  
ion source voltage 2 18.8 kV  
Lens voltage 6.8 kV  
Linear detector voltage 3.051 kV  
Deflection on  
Deflection mass  
Reflector voltage 1 0 kV  
Reflector voltage 2 0 kV  
Reflector detector volt. 2.542 kV

**Instrument**  
Instrument type ultraflexTOF/TOF  
Instrument serial 8276601.00598  
Name of computer UTX-00598  
Operator ID or name BDAL@DE  
flexControl version flexControl 3.4.135.0  
flexAnalysis version

---

**Native gel**

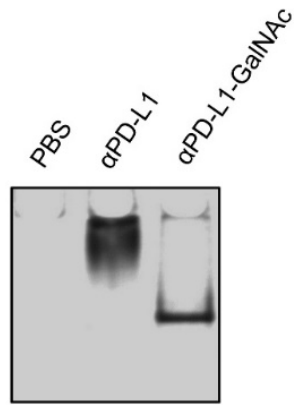

Native gel electrophoresis showing the synthesis of  $\alpha$ PD-L1-GalNAc.

---

## References

1. Banik, S.M. et al. Lysosome-targeting chimaeras for degradation of extracellular proteins. *Nature* **584**, 291-297 (2020).
2. Ahn, G. et al. LYTACs that engage the asialoglycoprotein receptor for targeted protein degradation. *Nat Chem Biol* **17**, 937–946 (2021).
3. Huang, B. et al. Designed endocytosis-triggering proteins mediate targeted degradation. *bioRxiv* (2023) DOI: 10.1101/2023.1108.1119.553321.
4. Li, Y. et al. Covalent LYTAC enabled by DNA aptamers for immune checkpoint degradation therapy. *J Am Chem Soc* **145**, 24506–24521 (2023).
5. Pance, K. et al. Modular cytokine receptor-targeting chimeras for targeted degradation of cell surface and extracellular proteins. *Nat Biotechnol* **41**, 273–281 (2022).
6. Cotton, A.D., Nguyen, D.P., Gramespacher, J.A., Seiple, I.B. & Wells, J.A. Development of antibody-based PROTACs for the degradation of the cell-surface immune checkpoint protein PD-L1. *J Am Chem Soc* **143**, 593-598 (2021).
7. Zheng, J. et al. Bifunctional compounds as molecular degraders for Integrin-facilitated targeted protein degradation. *J Am Chem Soc* **144**, 21831–21836 (2022).
8. Marei, H. et al. Antibody targeting of E3 ubiquitin ligases for receptor degradation. *Nature* **610**, 182–189 (2022).
9. Zhang, H. et al. Covalently Engineered Nanobody Chimeras for Targeted Membrane Protein Degradation. *J Am Chem Soc* **143**, 16377–16382 (2021).
10. Yu, J. et al. Harnessing the lysosomal sorting signals of the cation-independent mannose-6-phosphate receptor for targeted degradation of membrane proteins. *J Am Chem Soc* **145**, 19107–19119 (2023).
11. Su, W. et al. Targeted degradation of PD-L1 and activation of the STING pathway by carbon-dot-based PROTACs for cancer immunotherapy. *Angew Chem Int Ed* **62**, e202218128 (2023).
12. Mikitiuk, M. et al. IGF2 peptide-based LYTACs for targeted degradation of extracellular and transmembrane proteins. *Molecules* **28**, 7519 (2023).
13. Sun, R., Meng, Z., Lee, H., Offringa, R. & Niehrs, C. ROTACs leverage signaling-incompetent R-spondin for targeted protein degradation. *Cell Chem Biol* **30**, 739-752 (2023).
14. Zhang, B. et al. Insulin-like growth factor 2 (IGF2)-fused lysosomal targeting chimeras for degradation of extracellular and membrane proteins. *J Am Chem Soc* **63**, e202316089 (2023).
15. Zhang, D. et al. Transferrin receptor targeting chimeras (TransTACs) for membrane protein degradation. *bioRxiv* (2023) DOI: 10.1101/2023.1108.1110.552782.
16. Zhu, L. et al. Conjugation with glucagon like peptide-1 enables targeted protein degradation. *Bioorg Chem* **141**, 106908 (2023).
17. Wang, Q. et al. A co-assembly platform engaging macrophage scavenger receptor A for lysosome-targeting protein degradation. *Nat Commun* **15**, 1663 (2024).
