# Supplementary material for: A plug-and-play monofunctional platform for targeted degradation of extracellular proteins and vesicles
Source: PubMed Central journal article supplement — Nat Commun. 2024 Aug 22;15:7237. doi: 10.1038/s41467-024-51720-z (PMC11341853; doi:10.1038/s41467-024-51720-z), 2024-08-22
Supplement: 41467_2024_51720_MOESM2_ESM.pdf [file 41467_2024_51720_MOESM2_ESM.pdf]

## Reporting Summary

Nature Portfolio wishes to improve the reproducibility of the work that we publish. This form provides structure for consistency and transparency in reporting. For further information on Nature Portfolio policies, see our [Editorial Policies](#) and the [Editorial Policy Checklist](#).

### Statistics

For all statistical analyses, confirm that the following items are present in the figure legend, table legend, main text, or Methods section.

- |                                     |                                                                                                                                                                                                                                                                                                |
|-------------------------------------|------------------------------------------------------------------------------------------------------------------------------------------------------------------------------------------------------------------------------------------------------------------------------------------------|
| n/a                                 | Confirmed                                                                                                                                                                                                                                                                                      |
| <input type="checkbox"/>            | <input checked="" type="checkbox"/> The exact sample size ( $n$ ) for each experimental group/condition, given as a discrete number and unit of measurement                                                                                                                                    |
| <input type="checkbox"/>            | <input checked="" type="checkbox"/> A statement on whether measurements were taken from distinct samples or whether the same sample was measured repeatedly                                                                                                                                    |
| <input type="checkbox"/>            | <input checked="" type="checkbox"/> The statistical test(s) used AND whether they are one- or two-sided<br><i>Only common tests should be described solely by name; describe more complex techniques in the Methods section.</i>                                                               |
| <input checked="" type="checkbox"/> | <input type="checkbox"/> A description of all covariates tested                                                                                                                                                                                                                                |
| <input checked="" type="checkbox"/> | <input type="checkbox"/> A description of any assumptions or corrections, such as tests of normality and adjustment for multiple comparisons                                                                                                                                                   |
| <input type="checkbox"/>            | <input checked="" type="checkbox"/> A full description of the statistical parameters including central tendency (e.g. means) or other basic estimates (e.g. regression coefficient) AND variation (e.g. standard deviation) or associated estimates of uncertainty (e.g. confidence intervals) |
| <input type="checkbox"/>            | <input checked="" type="checkbox"/> For null hypothesis testing, the test statistic (e.g. $F$ , $t$ , $r$ ) with confidence intervals, effect sizes, degrees of freedom and $P$ value noted<br><i>Give <math>P</math> values as exact values whenever suitable.</i>                            |
| <input checked="" type="checkbox"/> | <input type="checkbox"/> For Bayesian analysis, information on the choice of priors and Markov chain Monte Carlo settings                                                                                                                                                                      |
| <input checked="" type="checkbox"/> | <input type="checkbox"/> For hierarchical and complex designs, identification of the appropriate level for tests and full reporting of outcomes                                                                                                                                                |
| <input type="checkbox"/>            | <input checked="" type="checkbox"/> Estimates of effect sizes (e.g. Cohen's $d$ , Pearson's $r$ ), indicating how they were calculated                                                                                                                                                         |

*Our web collection on [statistics for biologists](#) contains articles on many of the points above.*

### Software and code

Policy information about [availability of computer code](#)

**Data collection**

The particle size, size distribution, and zeta potential were measured using a Malvern DLS Zetasizer. The morphology of nanoparticles was acquired by transmission electron microscopy (Talos F200X S), scanning electron microscope (Scios2 Hivac) and Cryo-transmission electron microscopy (Talos F200C 200kV, FEI). Mass spectrometry was obtained on a Agilent 1290 Infinity II-6470. HRMS was obtained on a Ultraflex extreme high-resolution mass spectrometer. NMR spectra were obtained on a Bruker Avance III 400MHz spectrometer. Flow cytometry data were obtained using a BD FACSAria III. The absorbance at 450 nm or 562 nm in 96 well plates were measured using a Synergy H1 microplate reader (BioTek). Quantitative PCR was performed on a StepOnePlus Real-time PCR System (Applied Biosystems). TEM images of cell samples were obtained using a Hitachi H-7650 TEM. Fluorescence microscopy images were acquired by Nikon AX R confocal microscope with 405-nm, 488-nm, 561-nm, and 639-nm lasers. Gels and blots were imaged using a Chemiluminescence Imaging System (SH-Cute 523, Shenhua Science Technology Co., Ltd., Shanghai). The images of wound healing assay and cell migration and invasion assay were obtained by a SOPTOP XD20 microscope. The concentration of extracellular vesicles was measured using a Nanocoulter G counter (Resuntech Co., Ltd., Shenzhen).

**Data analysis**

Graphpad Prism (v 8.0) was used for data analysis. FlowJo (v 10.0) was used for flow cytometry data analysis. Zetasizer Software was used for particle size analysis. MestRenova (v14.0.0) was used for NMR analysis.

Fiji was used for Western blot quantification.  
NIS-Elements Viewer (v 5.21) was used for fluorescence microscopy image analysis.

For manuscripts utilizing custom algorithms or software that are central to the research but not yet described in published literature, software must be made available to editors and reviewers. We strongly encourage code deposition in a community repository (e.g. GitHub). See the Nature Portfolio [guidelines for submitting code & software](#) for further information.

## Data

Policy information about [availability of data](#)

All manuscripts must include a [data availability statement](#). This statement should provide the following information, where applicable:

- Accession codes, unique identifiers, or web links for publicly available datasets
- A description of any restrictions on data availability
- For clinical datasets or third party data, please ensure that the statement adheres to our [policy](#)

All data relevant to the manuscript are included in the article and its Supplementary Information. Further details and information could be provided by the corresponding authors upon request.

## Research involving human participants, their data, or biological material

Policy information about studies with [human participants or human data](#). See also policy information about [sex, gender \(identity/presentation\), and sexual orientation](#) and [race, ethnicity and racism](#).

|                                                                    |     |
|--------------------------------------------------------------------|-----|
| Reporting on sex and gender                                        | n/a |
| Reporting on race, ethnicity, or other socially relevant groupings | n/a |
| Population characteristics                                         | n/a |
| Recruitment                                                        | n/a |
| Ethics oversight                                                   | n/a |

Note that full information on the approval of the study protocol must also be provided in the manuscript.

## Field-specific reporting

Please select the one below that is the best fit for your research. If you are not sure, read the appropriate sections before making your selection.

- Life sciences       Behavioural & social sciences       Ecological, evolutionary & environmental sciences

For a reference copy of the document with all sections, see [nature.com/documents/nr-reporting-summary-flat.pdf](https://nature.com/documents/nr-reporting-summary-flat.pdf)

## Life sciences study design

All studies must disclose on these points even when the disclosure is negative.

|                 |                                                                                                                                                                                                                                                                                                                                         |
|-----------------|-----------------------------------------------------------------------------------------------------------------------------------------------------------------------------------------------------------------------------------------------------------------------------------------------------------------------------------------|
| Sample size     | No statistical methods were used to predetermine the sample size. Sample size was chosen based on previous lab experience to detect meaningful differences between treatments. There is low variability between western blot and flow cytometry experiments. Sample size followed common standard of n=2 or more biological replicates. |
| Data exclusions | There were no data exclusions except those resulting from technical errors making data interpretation impossible.                                                                                                                                                                                                                       |
| Replication     | All experiments were successfully replicated with at least two biological replicates.                                                                                                                                                                                                                                                   |
| Randomization   | The order of analysis for flow cytometry experiment was randomized. No other randomization was used as internal controls were used for quantitative comparisons.                                                                                                                                                                        |
| Blinding        | No blinding was performed in order to make comparisons between specific treatments.                                                                                                                                                                                                                                                     |

## Behavioural & social sciences study design

All studies must disclose on these points even when the disclosure is negative.

|                   |     |
|-------------------|-----|
| Study description | n/a |
|-------------------|-----|

|                   |     |
|-------------------|-----|
| Research sample   | n/a |
| Sampling strategy | n/a |
| Data collection   | n/a |
| Timing            | n/a |
| Data exclusions   | n/a |
| Non-participation | n/a |
| Randomization     | n/a |

## Ecological, evolutionary & environmental sciences study design

All studies must disclose on these points even when the disclosure is negative.

|                          |     |
|--------------------------|-----|
| Study description        | n/a |
| Research sample          | n/a |
| Sampling strategy        | n/a |
| Data collection          | n/a |
| Timing and spatial scale | n/a |
| Data exclusions          | n/a |
| Reproducibility          | n/a |
| Randomization            | n/a |
| Blinding                 | n/a |

Did the study involve field work?  Yes  No

## Reporting for specific materials, systems and methods

We require information from authors about some types of materials, experimental systems and methods used in many studies. Here, indicate whether each material, system or method listed is relevant to your study. If you are not sure if a list item applies to your research, read the appropriate section before selecting a response.

### Materials & experimental systems

|                                     |                                                                 |
|-------------------------------------|-----------------------------------------------------------------|
| n/a                                 | Included in the study                                           |
| <input type="checkbox"/>            | <input checked="" type="checkbox"/> Antibodies                  |
| <input type="checkbox"/>            | <input checked="" type="checkbox"/> Eukaryotic cell lines       |
| <input checked="" type="checkbox"/> | <input type="checkbox"/> Palaeontology and archaeology          |
| <input type="checkbox"/>            | <input checked="" type="checkbox"/> Animals and other organisms |
| <input checked="" type="checkbox"/> | <input type="checkbox"/> Clinical data                          |
| <input checked="" type="checkbox"/> | <input type="checkbox"/> Dual use research of concern           |
| <input checked="" type="checkbox"/> | <input type="checkbox"/> Plants                                 |

### Methods

|                                     |                                                    |
|-------------------------------------|----------------------------------------------------|
| n/a                                 | Included in the study                              |
| <input checked="" type="checkbox"/> | <input type="checkbox"/> ChIP-seq                  |
| <input type="checkbox"/>            | <input checked="" type="checkbox"/> Flow cytometry |
| <input checked="" type="checkbox"/> | <input type="checkbox"/> MRI-based neuroimaging    |

## Antibodies

Antibodies used

Goat Anti-Rabbit IgG Fc (Biotin), Abcam (ab97198), Functional;  
 Goat Anti-Mouse IgG H&L (Biotin), Abcam (ab207996), Functional;  
 Rabbit IgG, Elabscience (E-AB-1128), Functional;  
 Mouse IgG, Abmart (B30010M), Functional;

Rabbit IgG-Cy5, Shanghai Yaji Biological Co., Ltd (Ys-0295P-Cy5), Functional;

Anti-PDL1 antibody, Abcam (ab213480), Functional, WB, 1:1000;

Anti-PDL1 antibody, Proteintech (66248-1-Ig), IF, 1:200;

Anti-PDL1 antibody, BioXCell (BE0101), Functional;

FITC Anti-mouse CD274/PD-L1 Antibody, Elabscience (E-AB-F1132UC), Functional;

MMP-2 (D8N9Y) Rabbit mAb, Cell Signaling Technology (13132), WB, 1:1000;

Anti-MMP2 antibody, Abcam (ab92536), Functional, WB, 1:1000;

Biotin-Annexin V, Biolegend (640904), Functional;

Annexin V-Biotin Reagent, Elabscience (E-CK-A110), Functional;

Goat Anti-Mouse IgG H&L (Alexa Fluor® 647), Abcam (ab150115), IF, 1:1000;

Goat Anti-Rabbit IgG H&L (FITC conjugated), Elabscience (E-AB-1014), IF, 1:100;

EEA1 (C45B10) Rabbit mAb, Cell Signaling Technology (3288), WB, 1:1000;

Rab7 (D95F2)XP® Rabbit mAb, Cell Signaling Technology (9367), WB, 1:1000;

LAMP1 (D2D11)XP® Rabbit mAb, Cell Signaling Technology (9091), IF, 1:400;

CD107a / LAMP1 Monoclonal antibody, Proteintech (67300-1-Ig), WB, 1:5000;

Anti-GAPDH Recombinant Rabbit Monoclonal Antibody, HUABIO (ET1601-4), WB, 1:1000;

HRP-labeled Goat Anti-Rabbit IgG (H+L), Beyotime Biotechnology Co., Ltd (A0208), WB, 1:2000;

HRP-labeled Goat Anti-Mouse IgG (H+L), Beyotime Biotechnology Co., Ltd (A0216), WB, 1:2000.

## Validation

All antibodies used were validated antibody suppliers per quality assurance as detailed on each supplier's website.

Goat Anti-Rabbit IgG Fc (Biotin)(ab97198, Abcam):<https://www.abcam.cn/products/secondary-antibodies/goat-rabbit-igg-fc-biotin-ab97198.html>. Validated from manufacturer's website and citations therein.

Goat Anti-Mouse IgG H&L (Biotin)(ab207996, Abcam):<https://www.abcam.cn/products/secondary-antibodies/goat-mouse-igg-hl-biotin-ab207996.html>. Validated from manufacturer's website and citations therein.

Rabbit IgG (E-AB-1128, Elabscience):[https://www.elabscience.cn/p-rabbit\\_igg-573438.html](https://www.elabscience.cn/p-rabbit_igg-573438.html). Validated from manufacturer's website.

Mouse IgG (B30010M, Abmart ):<http://www.ab-mart.com.cn/page.aspx?node=%2066%20&id=%201003>. Validated from manufacturer's website and citations therein.

Rabbit IgG-Cy5 (Shanghai Yaji Biological Co., Ltd):<http://www.yajimall.com/product/detail/38618.html>. Validated from manufacturer's website.

Anti-PDL1 antibody (ab213480, Abcam):<https://www.abcam.cn/products/primary-antibodies/pd-l1-antibody-epr20529-ab213480.html>. Validated from manufacturer's website and citations therein.

Anti-PDL1 antibody (66248-1-Ig, Proteintech):<https://www.ptgcn.com/products/PD-L1-CD274-Antibody-66248-1-Ig.htm>. Validated from manufacturer's website and citations therein.

Anti-PDL1 antibody (BE0101, BioXCell):<https://bioxccl.com/invivomab-anti-mouse-pd-l1-b7-h1-be0101>. Validated from manufacturer's website and citations therein.

FITC Anti-mouse CD274/PD-L1 Antibody (E-AB-F1132UC, Elabscience):[https://www.elabscience.com/p-fitc\\_anti\\_mouse\\_cd274\\_pd\\_l1\\_antibody\\_10f.9g2\\_-385724.html](https://www.elabscience.com/p-fitc_anti_mouse_cd274_pd_l1_antibody_10f.9g2_-385724.html). Validated from manufacturer's website and citations therein.

MMP-2 (D8N9Y) Rabbit mAb (13132, Cell Signaling Technology):<https://www.cellsignal.cn/products/primary-antibodies/mmp-2-d8n9y-rabbit-mab/13132>. Validated from manufacturer's website and citations therein.

Anti-MMP2 antibody (ab92536, Abcam):<https://www.abcam.cn/products/primary-antibodies/mmp2-antibody-epr1184-ab92536.html>. Validated from manufacturer's website and citations therein.

Biotin-Annexin V (640904, Biolegend):<https://www.biolegend.com/en-us/products/biotin-annexin-v-9787>. Validated from manufacturer's website and citations therein.

Annexin V-Biotin Reagent (E-CK-A110, Elabscience):[https://www.elabscience.cn/p-annexin\\_v\\_biotin\\_reagent-260151.html](https://www.elabscience.cn/p-annexin_v_biotin_reagent-260151.html). Validated from manufacturer's website.

Goat Anti-Mouse IgG H&L (Alexa Fluor® 647) (ab150115, Abcam):<https://www.abcam.cn/products/secondary-antibodies/goat-mouse-igg-hl-alexa-fluor-647-ab150115.html>. Validated from manufacturer's website and citations therein.

Goat Anti-Rabbit IgG H&L (FITC conjugated) (E-AB-1014, Elabscience):[https://www.elabscience.cn/p-goat\\_anti\\_rabbit\\_igg\\_h\\_l\\_fitc\\_conjugated\\_-77939.html](https://www.elabscience.cn/p-goat_anti_rabbit_igg_h_l_fitc_conjugated_-77939.html). Validated from manufacturer's website.

EEA1 (C45B10) Rabbit mAb (3288, Cell Signaling Technology):<https://www.cellsignal.cn/products/primary-antibodies/eea1-c45b10-rabbit-mab/3288>. Validated from manufacturer's website and citations therein.

Rab7 (D95F2)XP® Rabbit mAb (9367, Cell Signaling Technology):<https://www.cellsignal.cn/products/primary-antibodies/rab7-d95f2-xp-rabbit-mab/9367>. Validated from manufacturer's website and citations therein.

LAMP1 (D2D11)XP® Rabbit mAb (9091, Cell Signaling Technology):<https://www.cellsignal.cn/products/primary-antibodies/lamp1-d2d11-xp-rabbit-mab/9091>. Validated from manufacturer's website and citations therein.

CD107a / LAMP1 Monoclonal antibody (67300-1-Ig, Proteintech):<https://www.ptgcn.com/products/CD107a-Antibody-67300-1-Ig.htm>. Validated from manufacturer's website and citations therein.

Anti-GAPDH Recombinant Rabbit Monoclonal Antibody (ET1601-4, HUABIO): <http://www.huabio.cn/product/GAPDH-antibody-ET1601-4>. Validated from manufacturer's website.

HRP-labeled Goat Anti-Rabbit IgG (H+L) (A0208, Beyotime Biotechnology Co., Ltd):<https://www.beyotime.com/product/A0208.htm>. Validated from manufacturer's website.

HRP-labeled Goat Anti-Mouse IgG (H+L) (A0216, Beyotime Biotechnology Co., Ltd):<https://www.beyotime.com/product/A0216.htm>. Validated from manufacturer's website.

## Eukaryotic cell lines

Policy information about [cell lines and Sex and Gender in Research](#)

|                                                                   |                                                                                                                                                                                                                                                                                                                                          |
|-------------------------------------------------------------------|------------------------------------------------------------------------------------------------------------------------------------------------------------------------------------------------------------------------------------------------------------------------------------------------------------------------------------------|
| Cell line source(s)                                               | B16F10, CT26, SKOV3, MCF-7, MDAMB231, 4T1, HeLa and HepG2 cell lines were obtained from the Cell Bank of the Chinese Academy of Sciences (Shanghai, China). Raw 264.7 cell was purchased from Procell Life Science&Technology Co., Ltd. (Wuhan, China). ECDHCC-1 cell was purchased from Fusheng Industrial Co., Ltd. (Shanghai, China). |
| Authentication                                                    | Cell lines have not been subjected to additional authentication.                                                                                                                                                                                                                                                                         |
| Mycoplasma contamination                                          | Cell lines were not tested for mycoplasma contamination.                                                                                                                                                                                                                                                                                 |
| Commonly misidentified lines (See <a href="#">ICLAC</a> register) | No commonly misidentified cell lines were used.                                                                                                                                                                                                                                                                                          |

## Palaeontology and Archaeology

|                                                                                                                                                 |     |
|-------------------------------------------------------------------------------------------------------------------------------------------------|-----|
| Specimen provenance                                                                                                                             | n/a |
| Specimen deposition                                                                                                                             | n/a |
| Dating methods                                                                                                                                  | n/a |
| <input type="checkbox"/> Tick this box to confirm that the raw and calibrated dates are available in the paper or in Supplementary Information. |     |
| Ethics oversight                                                                                                                                | n/a |

Note that full information on the approval of the study protocol must also be provided in the manuscript.

## Animals and other research organisms

Policy information about [studies involving animals; ARRIVE guidelines](#) recommended for reporting animal research, and [Sex and Gender in Research](#)

|                    |                              |
|--------------------|------------------------------|
| Laboratory animals | C57BL/6 mouse, 6-8 weeks old |
|--------------------|------------------------------|

|                         |                                                                                                                                                                                                                                       |
|-------------------------|---------------------------------------------------------------------------------------------------------------------------------------------------------------------------------------------------------------------------------------|
| Wild animals            | n/a                                                                                                                                                                                                                                   |
| Reporting on sex        | Only female mice were used in the study.                                                                                                                                                                                              |
| Field-collected samples | n/a                                                                                                                                                                                                                                   |
| Ethics oversight        | All animal experiments were performed according to the protocols approved by the Institutional Animal Care and Use Committee (IACUC) of Zhejiang University (approval number: 20379) in accordance with the institutional guidelines. |

Note that full information on the approval of the study protocol must also be provided in the manuscript.

## Clinical data

Policy information about [clinical studies](#)

All manuscripts should comply with the ICMJE [guidelines for publication of clinical research](#) and a completed [CONSORT checklist](#) must be included with all submissions.

|                             |     |
|-----------------------------|-----|
| Clinical trial registration | n/a |
| Study protocol              | n/a |
| Data collection             | n/a |
| Outcomes                    | n/a |

## Dual use research of concern

Policy information about [dual use research of concern](#)

### Hazards

Could the accidental, deliberate or reckless misuse of agents or technologies generated in the work, or the application of information presented in the manuscript, pose a threat to:

| No                                  | Yes                      |                            |
|-------------------------------------|--------------------------|----------------------------|
| <input checked="" type="checkbox"/> | <input type="checkbox"/> | Public health              |
| <input checked="" type="checkbox"/> | <input type="checkbox"/> | National security          |
| <input checked="" type="checkbox"/> | <input type="checkbox"/> | Crops and/or livestock     |
| <input checked="" type="checkbox"/> | <input type="checkbox"/> | Ecosystems                 |
| <input checked="" type="checkbox"/> | <input type="checkbox"/> | Any other significant area |

### Experiments of concern

Does the work involve any of these experiments of concern:

| No                                  | Yes                      |                                                                             |
|-------------------------------------|--------------------------|-----------------------------------------------------------------------------|
| <input checked="" type="checkbox"/> | <input type="checkbox"/> | Demonstrate how to render a vaccine ineffective                             |
| <input checked="" type="checkbox"/> | <input type="checkbox"/> | Confer resistance to therapeutically useful antibiotics or antiviral agents |
| <input checked="" type="checkbox"/> | <input type="checkbox"/> | Enhance the virulence of a pathogen or render a nonpathogen virulent        |
| <input checked="" type="checkbox"/> | <input type="checkbox"/> | Increase transmissibility of a pathogen                                     |
| <input checked="" type="checkbox"/> | <input type="checkbox"/> | Alter the host range of a pathogen                                          |
| <input checked="" type="checkbox"/> | <input type="checkbox"/> | Enable evasion of diagnostic/detection modalities                           |
| <input checked="" type="checkbox"/> | <input type="checkbox"/> | Enable the weaponization of a biological agent or toxin                     |
| <input checked="" type="checkbox"/> | <input type="checkbox"/> | Any other potentially harmful combination of experiments and agents         |

## Plants

|                       |     |
|-----------------------|-----|
| Seed stocks           | n/a |
| Novel plant genotypes | n/a |
| Authentication        | n/a |

## ChIP-seq

### Data deposition

- Confirm that both raw and final processed data have been deposited in a public database such as [GEO](#).
- Confirm that you have deposited or provided access to graph files (e.g. BED files) for the called peaks.

|                                                                    |     |
|--------------------------------------------------------------------|-----|
| Data access links<br><i>May remain private before publication.</i> | n/a |
| Files in database submission                                       | n/a |
| Genome browser session<br>(e.g. <a href="#">UCSC</a> )             | n/a |

### Methodology

|                         |     |
|-------------------------|-----|
| Replicates              | n/a |
| Sequencing depth        | n/a |
| Antibodies              | n/a |
| Peak calling parameters | n/a |
| Data quality            | n/a |
| Software                | n/a |

## Flow Cytometry

### Plots

Confirm that:

- The axis labels state the marker and fluorochrome used (e.g. CD4-FITC).
- The axis scales are clearly visible. Include numbers along axes only for bottom left plot of group (a 'group' is an analysis of identical markers).
- All plots are contour plots with outliers or pseudocolor plots.
- A numerical value for number of cells or percentage (with statistics) is provided.

### Methodology

|                           |                                                                                                                                                                                                                                                                                                                                                                                                                                                                              |
|---------------------------|------------------------------------------------------------------------------------------------------------------------------------------------------------------------------------------------------------------------------------------------------------------------------------------------------------------------------------------------------------------------------------------------------------------------------------------------------------------------------|
| Sample preparation        | For endocytosis experiments, the cells were washed twice with PBS after a certain period of incubation of the nanomaterials, trypsinized for <1 minute and transferred to Eppendorf tubes. The cells were washed twice with PBS + 0.5% FBS and resuspended in 200 µL of PBS. Flow cytometry was performed on a BD FACSAria III and gating was performed on single cells and live cells before acquisition of 10,000 cells. Analysis was performed using the FlowJo software. |
| Instrument                | BD FACSAria III                                                                                                                                                                                                                                                                                                                                                                                                                                                              |
| Software                  | Data analysis was performed using the FlowJo v10.0.                                                                                                                                                                                                                                                                                                                                                                                                                          |
| Cell population abundance | N/A-cell sorting was not performed.                                                                                                                                                                                                                                                                                                                                                                                                                                          |

## Gating strategy

Representative gating strategies are in the Supplementary Fig. 2. Debris was gated out by the FSC and SSC area, and single cells were gated on FSC-A and FSC-H, and live cells were gated.

Tick this box to confirm that a figure exemplifying the gating strategy is provided in the Supplementary Information.

## Magnetic resonance imaging

### Experimental design

Design type

Design specifications

Behavioral performance measures

### Acquisition

Imaging type(s)

Field strength

Sequence & imaging parameters

Area of acquisition

Diffusion MRI  Used  Not used

### Preprocessing

Preprocessing software

Normalization

Normalization template

Noise and artifact removal

Volume censoring

### Statistical modeling & inference

Model type and settings

Effect(s) tested

Specify type of analysis:  Whole brain  ROI-based  Both

Statistic type for inference

(See [Eklund et al. 2016](#))

Correction

### Models & analysis

n/a | Involved in the study

Functional and/or effective connectivity

Graph analysis

Multivariate modeling or predictive analysis
